# Supplementary material
Source: publisher figshare collection journal article supplement (https://asha.figshare.com/articles/dataset/_/6170243)
Supplement: Supplementary file 1 [file 1]

## ONLINE SUPPLEMENTAL MATERIALS – TABLE S1

**Table S1**

*State of the Evidence Pertaining to SLP Treatment for Individuals with PVFM: Participant Demographics and Treatment Characteristics*

| Study design                 | Citation                        | N (gender: M/F)                                               | Age(s)                     | Treatment type                                                                                  | Service delivery                                                                                                                                          | Co-occurring txs                                                                                                                                                                                                      |
|------------------------------|---------------------------------|---------------------------------------------------------------|----------------------------|-------------------------------------------------------------------------------------------------|-----------------------------------------------------------------------------------------------------------------------------------------------------------|-----------------------------------------------------------------------------------------------------------------------------------------------------------------------------------------------------------------------|
| Randomized controlled trials | Nacci et al. (2011)             | 20 (4M/16F)                                                   | (Mean=44.2; SD=9.6)        | Respiratory retraining therapy                                                                  | 45 min 5x/wk for 2-3 wks/cycle<br>Group A received 1 cycle every 12 mo. for 2 yrs (3 cycles)<br>Group B received 1 cycle every 3 mo. for 2 yrs (9 cycles) | Benzodiazepine for anxiety                                                                                                                                                                                            |
|                              | Vertigan et al. (2008)          | 83 (22M/61F)                                                  | 19-84 (Mean=54.5; SD=17.1) | Treatment Group: SPEICH-C<br>Control Group: Healthy lifestyle education                         | 30 min. sessions, NFD                                                                                                                                     | NR                                                                                                                                                                                                                    |
| Single-subject               | Mathers-Schmidt & Brilla (2005) | 1 (F)                                                         | 18                         | Inspiratory muscle training                                                                     | 30 min, 5x/wk for 5 wks (for each study phase)                                                                                                            | NR                                                                                                                                                                                                                    |
| Pre-post designs             | Murry et al. (2006)             | 20 (7M/13F)                                                   | 18-87 (Mean=54)            | Respiratory retraining therapy                                                                  | 3-5 sessions (Mean=3.9) over 3 wks-4.1 mo.                                                                                                                | Proton-pump inhibitor                                                                                                                                                                                                 |
|                              | Ryan et al. (2009)              | 10 (of 14) attended speech therapy sessions (NR for subgroup) | NR for subgroup            | Education, hygiene, cough suppression and breathing exercises, and psychoeducational counseling | 4 sessions; 1x/wk                                                                                                                                         | Nasal continuous airway pressure, inhaled corticosteroid/ long-acting beta agonist, proton-pump inhibitor antireflux diet, postural modification, oral antihistamine, nasal corticosteroid spray, or antihypertensive |
| Case series                  | Chiang et al. (2013)            | 64 (NR for subgroup)                                          | NR for subgroup            | Laryngeal control therapy                                                                       | 1 session: 21 patients<br>2 sessions: 27 patients<br>3 sessions: 13 patients<br>4(+) sessions: 3 patients                                                 | NR                                                                                                                                                                                                                    |

|                           |                      |                            |                                                              |                                                                                             |                                                                                                                                   |
|---------------------------|----------------------|----------------------------|--------------------------------------------------------------|---------------------------------------------------------------------------------------------|-----------------------------------------------------------------------------------------------------------------------------------|
| Christopher et al. (1983) | 5 (1M/4F)            | 14-68 (Mean=32.8; SD=20.9) | Breathing techniques and oropharyngeal muscle relaxation     | NR                                                                                          | Psychotherapy, inhalation of 80% helium and 20% oxygen gas mixture                                                                |
| Doshi & Weinberger (2006) | 8 (3M/5F)            | 8-16                       | Speech therapy, NFD                                          | NR                                                                                          | Anticholinergic aerosol                                                                                                           |
| Maturo et al. (2011)      | 56 (NR for subgroup) | NR for subgroup            | Laryngeal control, desensitization, and breathing techniques | 1-10 sessions (Mean=3.7)<br>Duration: Mean=10.3 wks (for those needing more than 1 session) | Proton-pump inhibitors, biofeedback                                                                                               |
| Murry et al. (2010)       | 16 (NR)              | 29-69                      | Respiratory retraining therapy                               | 2-13 sessions (Mean=5.7)                                                                    | Proton-pump inhibitor                                                                                                             |
| Murry et al. (2004)       | 5 (1M/4F)            | 42-67                      | Respiratory retraining therapy                               | 2-6 sessions (Mean=4)                                                                       | Proton-pump inhibitor, night-time histamine type 2 (H <sub>2</sub> ) antagonist, and lifestyle modification                       |
| Powell et al. (2007)      | 14 (0M/14F)          | 11-18 (Mean=15.3; SD=1.44) | Breathing techniques and cognitive-behavioral approach       | 0-8 sessions (Mean=3.4)                                                                     | NR                                                                                                                                |
| Rameau et al. (2012)      | 22 (6M/16F)          | 7-20 (Mean=13.4)           | Breathing and relaxation techniques, "Quick Sniff" technique | 1-4 sessions (Mean=1.3)                                                                     | Inhalers, proton-pump inhibitors, histamine 2 receptor blockers, Cetirizine, Fexofenadine, Melatonin, Methylphenidate, Sertraline |
| Sullivan et al. (2001)    | 20 (0M/20F)          | 12-17 (Mean=14.1)          | Education, thoracic-abdominal breathing                      | 1 session                                                                                   | Asthma medication, antidepressant                                                                                                 |
| Towey (2012)              | 7 (0M/7F)            | 11-38 (Mean=17.4;          | Voice facilitation and                                       | 1-4 sessions (Mean=1.9)                                                                     | NR                                                                                                                                |

|              |                           |           | SD=9.2) | performance techniques                                                                | mostly conducted via telepractice |                                                                                                     |
|--------------|---------------------------|-----------|---------|---------------------------------------------------------------------------------------|-----------------------------------|-----------------------------------------------------------------------------------------------------|
| Case studies | Altman et al. (2000)      | 2 (1M/1F) | 12, 19  | Visual biofeedback + speech therapy involving relaxation maneuvers and breath control | NR                                | Botulinum toxin injection, medical management of psychiatric disorders, intubation                  |
|              | Archer et al. (2000)      | 1 (F)     | 22      | Speech therapy, NFD                                                                   | NR                                | Diazepam and chlorpromazine                                                                         |
|              | Bahrainwala et al. (2001) | 1 (F)     | 16      | Speech therapy, NFD                                                                   | NR                                | Psychological counseling                                                                            |
|              | Barnes et al. (1986)      | 1 (M)     | 15      | Speech therapy and breathing exercises                                                | NR                                | Psychiatric consultation, relaxation therapy, self-hypnosis, nebulized bronchodilators and steroids |
|              | Bittleman et al. (1994)   | 1 (F)     | 16      | Speech therapy, NFD                                                                   | NR                                | NR                                                                                                  |
|              | Campaignha et al. (2012)  | 1 (F)     | 41      | Speech therapy including patient education                                            | NR                                | Psychotherapy                                                                                       |
|              | Chawla et al. (1984)      | 1 (F)     | 23      | Speech therapy, NFD                                                                   | NR                                | Psychotherapy                                                                                       |
|              | Chiang et al. (2008)      | 1 (F)     | 9       | Speech therapy, NFD                                                                   | NR                                | None                                                                                                |
|              | Corren & Newman (1992)    | 1 (F)     | 20      | Speech therapy, NFD                                                                   | Several weeks, NFD                | NR                                                                                                  |
|              | Craig et al. (1992)       | 1 (F)     | 43      | Speech therapy                                                                        | NR                                | Psychotherapy, inhaled albuterol                                                                    |
|              | Earles et al. (2003)      | 1 (F)     | 26      | Speech therapy                                                                        | 7 weeks                           | Biofeedback + self-regulation                                                                       |
|              | Echternach et al. (2008)  | 1 (F)     | 41      | Voice therapy                                                                         | NR                                | Antacid therapy, psychotherapy                                                                      |

|                           |             |            |                                                                                                                                            |                       |                                                                                                    |
|---------------------------|-------------|------------|--------------------------------------------------------------------------------------------------------------------------------------------|-----------------------|----------------------------------------------------------------------------------------------------|
| Harbison et al. (2000)    | 1 (F)       | 47         | Speech therapy, NFD                                                                                                                        | NR                    | NR                                                                                                 |
| Hatzelis & Murry (2012)   | 1 (F)       | 24         | Respiratory retraining therapy                                                                                                             | 1x/ week for 1 month  | None                                                                                               |
| Hayes et al. (1993)       | 3 (0M/3F)   | 28, 24, 33 | Speech therapy, NFD                                                                                                                        | NR                    | Psychotherapy, hypnotherapy, steroids, beta-agonists, anticholinergics, theophyllines, biofeedback |
| Kayani et al. (1998)      | 2 (F)       | 11, 12     | Speech therapy, NFD                                                                                                                        | NR                    | NR                                                                                                 |
| Kivity et al. (1986)      | 1 (F)       | 15         | Speech therapy, NFD                                                                                                                        | NR                    | NR                                                                                                 |
| Koester & Amundson (2002) | 1 (F)       | 17         | Speech therapy, including corrective breathing techniques                                                                                  | Several sessions, NFD | None                                                                                               |
| Leo & Konakanchi (1999)   | 1 (F)       | 32         | Speech therapy                                                                                                                             | NR                    | Psychotherapy                                                                                      |
| Marsh et al. (1994)       | 1 (F)       | 33         | Speech therapy, to improve awareness of vocal fold position                                                                                | NR                    | Psychiatric counseling                                                                             |
| Maschka et al. (1997)     | 2 (0M/2F)   | 15, 11     | First case: Speech therapy and behavioral modification;<br>Second case: speech therapy to relax the throat and improve respiratory control | NR                    | NR                                                                                                 |
| Mathers-Schmidt (2001)    | 2 (1F, 1NR) | 15, 50     | Education, muscle tension reduction, relaxed throat breathing                                                                              | NR                    | NR                                                                                                 |
| Mobeireek et al. (1995)   | 2 (0M/2F)   | 40, 24     | First case: breathing exercises;                                                                                                           | NR                    | Psychotherapy, steroids, bronchodilators                                                           |

|                         |           |                |                                                                                                                                                                                                                    |                                                                               |                                                                                                                           |
|-------------------------|-----------|----------------|--------------------------------------------------------------------------------------------------------------------------------------------------------------------------------------------------------------------|-------------------------------------------------------------------------------|---------------------------------------------------------------------------------------------------------------------------|
|                         |           |                | Second case: speech therapy, breathing exercises, and education                                                                                                                                                    |                                                                               |                                                                                                                           |
| Mullinax & Kuhn (1996)  | 1 (F)     | 18             | Speech and behavioral therapy to increase laryngeal control                                                                                                                                                        | NR                                                                            | Racemic epinephrine nebulizer, benzodiazepine                                                                             |
| Murry (1998)            | 1 (F)     | 51             | Breathing exercises                                                                                                                                                                                                | ~2x/wk for 11 wks                                                             | Antireflux medication, restricted diet, and lifestyle modifications                                                       |
| Nacci et al. (2007)     | 3 (0M/3F) | 50, 35, 47     | Speech therapy, including reduction of laryngeal muscle contraction, breathing exercises, pneumophonic coordination exercises, and “laryngeal gymnastics”                                                          | Case 1: Course lasted ~20 days and was repeated each month.<br>Cases 2&3: NR- | relaxation exercises, psychological approaches, proton pump inhibitor                                                     |
| Niven et al. (1992)     | 3 (0M/3F) | 21,18,31       | Speech therapy                                                                                                                                                                                                     | NR                                                                            | Steroids, nedocromil, salbutamol, ipratropium, prednisone                                                                 |
| Pinho et al. (1997)     | 1 (M)     | 36             | Speech therapy including reassurance, behavioral breathing exercises, diaphragmatic breathing, “wide-open throat breathing,” increasing self-awareness, and teaching breathing techniques during physical activity | 30 min, 1x/wk for 4 wks -                                                     | NR                                                                                                                        |
| Reisner & Nelson (1997) | 4 (1M/3F) | 40, 60, 24, 38 | Speech therapy                                                                                                                                                                                                     | NR                                                                            | Psychosocial consultation, nasal saline irrigation, beclomethasone dipropionate nasal spray, albuterol MDI, triamcinolone |

|                          |           |        |                                                                                                                                                                                                                                                                                               |                                                                          |                                                                                                                                 |
|--------------------------|-----------|--------|-----------------------------------------------------------------------------------------------------------------------------------------------------------------------------------------------------------------------------------------------------------------------------------------------|--------------------------------------------------------------------------|---------------------------------------------------------------------------------------------------------------------------------|
| Renz et al. (2000)       | 2 (0M/2F) | 22, 77 | Speech therapy, NFD                                                                                                                                                                                                                                                                           | Case 1: NR<br>Case 2: 2 sessions<br>NR                                   | Cefuroxime, steroids                                                                                                            |
| Rhodes (2008)            | 1 (M)     | 16     | Speech therapy, including exercises and a trial of biofeedback                                                                                                                                                                                                                                | NR                                                                       | Lansoprazole (for reflux), psychotherapy                                                                                        |
| Rogers & Stell (1978)    | 2 (0M/2F) | 30, 19 | Speech therapy, NFD                                                                                                                                                                                                                                                                           | NR                                                                       | Steroids (tapered off)                                                                                                          |
| Ruddy et al. (2004)      | 1 (M)     | 15     | IMST and behavioral breathing exercises                                                                                                                                                                                                                                                       | IMST: 5x/wk for 6 wks.<br>Behavioral treatment: 40 min, 1x/wk for 10 wks | NR                                                                                                                              |
| Rusakow et al. (1991)    | 1 (F)     | 13     | Speech therapy consisting of breathing techniques                                                                                                                                                                                                                                             | Initial 2 hr session + additional sessions, NFD                          | Theophylline, triamcinolone, albuterol, cromolyn sodium, bronchodilators, corticosteroids, supplemental oxygen, and antibiotics |
| Sandage & Zelanzy (2004) | 1 (F)     | 15     | Breathing exercises + visual feedback and attention/relaxation exercises                                                                                                                                                                                                                      | Initial evaluation + 1 session                                           | Reflux medication, nasal steroid                                                                                                |
| Sette et al. (1993)      | 1 (M)     | 16     | Breathing techniques and oropharyngeal muscle relaxation                                                                                                                                                                                                                                      | At least 5 months, NFD                                                   | Psychological therapy                                                                                                           |
| Shao et al. (1995)       | 1 (M)     | 13     | Speech therapy + guidance on using breathing muscles appropriately                                                                                                                                                                                                                            | NR                                                                       | Antibiotics, allergic desensitization, corticosteroids                                                                          |
| Sharma & Singh (2007)    | 1 (M)     | 11     | Speech therapy including patient assurance, education, vocal hygiene, diaphragmatic breathing and episode control, relaxation and breathing techniques. Treatments were initially conducted while the patient was at rest and gradually acclimated the patient to increased activity demands. | 1x/wk for 6 wks                                                          | NR                                                                                                                              |

|                             |           |        |                                                                                                                                                                                        |                                           |                                                                                                                            |
|-----------------------------|-----------|--------|----------------------------------------------------------------------------------------------------------------------------------------------------------------------------------------|-------------------------------------------|----------------------------------------------------------------------------------------------------------------------------|
| Skinner & Bradley (1989)    | 1 (F)     | 11     | Speech therapy, NFD                                                                                                                                                                    | NR                                        | NR                                                                                                                         |
| Smith et al. (1993)         | 1 (F)     | 16     | Speech therapy including behavioral breathing exercises, prevention of episodes, and treatment of hyperfunctional voice disorder                                                       | NR                                        | Nebulization treatments, steroids, antibiotics                                                                             |
| Suri et al. (2002)          | 1 (F)     | 15     | Speech therapy, NFD                                                                                                                                                                    | NR                                        | Psychotherapy (steroids tapered off)                                                                                       |
| Suttithawil et al. (2006)   | 1 (F)     | 36     | Speech therapy, NFD                                                                                                                                                                    | NR                                        | Dietary and lifestyle modifications, proton pump inhibitor, antidepressant, calcium-channel blocker, psychological support |
| Tajchman & Gitterman (1996) | 1 (F)     | 14     | Speech therapy involving breathing exercises                                                                                                                                           | NR                                        | NR                                                                                                                         |
| Tan et al. (1997)           | 1 (F)     | 62     | Speech therapy, NFD                                                                                                                                                                    | NR                                        | Beta 2 agonists, corticosteroids                                                                                           |
| Tilles (2010)               | 1 (F)     | 13     | Speech therapy, NFD                                                                                                                                                                    | 5 sessions over 6 wks                     | None                                                                                                                       |
| Von Berg et al. (1999)      | 2 (1M/1F) | 34, 65 | Speech therapy- behavioral management program involving patient education, relaxation of jaw, shoulders, and neck, breathing focus at oral cavity, and reducing precipitating factors. | Case 1: 18 sessions<br>Case 2: 2 sessions | Continuous positive airway pressure, anti-anxiety medications, antireflux counseling,                                      |
| Walaschek et al. (2010)     | 1 (F)     | 15     | Voice therapy, NFD                                                                                                                                                                     | NR                                        | Omeprazole, psychotherapeutic support                                                                                      |
| Warnes & Allen (2005)       | 1 (F)     | 16     | Speech therapy- controlled breathing exercises                                                                                                                                         | NR                                        | NR                                                                                                                         |

|                      |           |        |                                                                                                                                                                                                                            |    |                                                                               |
|----------------------|-----------|--------|----------------------------------------------------------------------------------------------------------------------------------------------------------------------------------------------------------------------------|----|-------------------------------------------------------------------------------|
| Weir (2002)          | 2 (2M/0F) | 13, 15 | Case 1: Initially treated with speech therapy involving laryngeal relaxation exercises, later treated with voice training, NFD;<br>Case 2: Voice therapy for laryngeal relaxation                                          | NR | Heliox, beta agonists, inhaled anti-inflammatory medication                   |
| Wilson et al. (2009) | 2 (1M/1F) | 16, 15 | Case 1: Patient education, training to identify the onset of an attack, breathing techniques and behavioral and dietary modifications, deep nasal sniff technique<br>Case 2: speech therapy and deep nasal sniff technique | NR | Albuterol, proton pump inhibitor, bronchodilators, corticosteroids, steroids, |

*Note.* IMST: inspiratory muscle strength training; NFD= not further described; NR= not reported; SPEICH-C = SPEech Pathology Intervention Program for CHronic Cough.



Table S2

*State of the Evidence Pertaining to SLP Treatment for Individuals with PVFM: Descriptive and Quantitative Outcomes*

| Study design                    | Citation                               | Outcome type<br>(quantitative/<br>descriptive) | Outcome measure                                        | Pre tx data                                                                     | Post tx results/ <i>follow-up</i><br><i>results</i>                                | Effect size/ p-value                                                                      |
|---------------------------------|----------------------------------------|------------------------------------------------|--------------------------------------------------------|---------------------------------------------------------------------------------|------------------------------------------------------------------------------------|-------------------------------------------------------------------------------------------|
| Randomized<br>controlled trials | Nacci et al.<br>(2011)                 | Quantitative                                   | # of dyspnea<br>episodes/month                         | Low frequency tx group (A):<br>M= 9.6<br>High frequency tx group (B):<br>M= 9.9 | A: M= 7.2<br>B: M= 0.9                                                             | Within-group:<br>A: $p < .01$<br>B: $p < .01$<br>Between-group:<br>$p < .01$ (favoring B) |
|                                 |                                        | Quantitative                                   | Dyspnea ratings (based<br>on 0-10 scale,<br>10=severe) | Low frequency tx group (A):<br>M=9.2<br>High frequency tx group (B):<br>M=9.3   | A: M=M=6.2<br>B: M=M=2.5                                                           | Within-group:<br>A: $p < .01$<br>B: $p < .01$<br>Between-group: $p < .01$<br>(favoring B) |
|                                 | Vertigan et al.<br>(2008)              | (See full manuscript, Table 2)                 |                                                        |                                                                                 |                                                                                    |                                                                                           |
| Single subject                  | Mathers-<br>Schmidt &<br>Brilla (2005) | (See full manuscript, Table 1)                 |                                                        |                                                                                 |                                                                                    |                                                                                           |
| Pre-post<br>designs             | Murry et al.<br>(2006)                 | Quantitative                                   | FVC                                                    | 39 - 129% predicted (M=89.5%)                                                   | 44 - 127% predicted<br>(M=95.3%)<br><i>88 - 124% predicted</i><br>(M=101.2%) (N=9) | NS                                                                                        |
|                                 |                                        | Quantitative                                   | FIV <sub>1</sub> /FIVC                                 | 0.37 - 1.0 (M=0.89)                                                             | 0.85 - 1.0 (M=0.97)<br><i>0.96 - 1.0 (M=0.99) (N=9)</i>                            | NS                                                                                        |
|                                 |                                        | Quantitative                                   | FIV <sub>.5</sub> /FIVC                                | 0.32 - 0.86 (M=0.62)                                                            | 0.44 - 0.96 (M=0.81)<br><i>0.77 - 0.95 (M=0.88) (N=9)</i>                          | Within-group: $p \leq .001$<br>(improvement)                                              |
|                                 | Ryan et al.<br>(2009)                  | Quantitative                                   | FVC                                                    | Median= 99.6% predicted (IQR=<br>29.1)                                          | Median= 93.1% predicted<br>(IQR=15.0)                                              | NS                                                                                        |
|                                 |                                        | Quantitative                                   | FEV <sub>1</sub> (% predicted)                         | Median= 90.8 (SEM=19.3)                                                         | Median= 90.7 (SEM=18.3)                                                            | NS                                                                                        |
|                                 |                                        | Quantitative                                   | FIF <sub>50</sub>                                      | Median=2.97 L (IQR = 1.72 L)                                                    | Median= 2.85 L (IQR=1.10 L)                                                        | NS                                                                                        |

|             |                           |                                              |                                               |                                                                                                                                                                                          |                                                                                                                                                                                                                      |                                             |
|-------------|---------------------------|----------------------------------------------|-----------------------------------------------|------------------------------------------------------------------------------------------------------------------------------------------------------------------------------------------|----------------------------------------------------------------------------------------------------------------------------------------------------------------------------------------------------------------------|---------------------------------------------|
|             |                           |                                              |                                               | Median= 78.3% predicted (IQR= 30.0%)                                                                                                                                                     | Median= 70.6% predicted (IQR= 24.4%)                                                                                                                                                                                 |                                             |
|             | Quantitative              | FEV <sub>1</sub> /FVC                        |                                               | Median= 0.82 (IQR= 0.08)                                                                                                                                                                 | Median= 0.82 (IQR=0.011)                                                                                                                                                                                             | NS                                          |
|             | Quantitative              | FENO                                         |                                               | Median= 13.7 (IQR= 8.8)                                                                                                                                                                  | Median=12.9 (IQR=7.6)                                                                                                                                                                                                | NS                                          |
|             | Descriptive               | Laryngoscopy                                 |                                               | 10/10 participants observed to show adduction of VF                                                                                                                                      | 8/10 participants with resolved PVFM                                                                                                                                                                                 | $p = .039$                                  |
|             | Quantitative              | Ratings of laryngeal dysfunction (using LDQ) |                                               | Median = 5 (IQR= 4)                                                                                                                                                                      | Median=3.5 (IQR=4)                                                                                                                                                                                                   | Within-group<br>$p = .008$<br>(improvement) |
| Case series | Chiang et al. (2013)      | Descriptive                                  | Report of PVFM symptoms                       | 64/64 participants demonstrated signs and symptoms of PVFM                                                                                                                               | 48/64 participants demonstrated complete resolution of symptoms                                                                                                                                                      | NR, not calculable                          |
|             | Christopher et al. (1983) | Descriptive                                  | Report of PVFM symptoms                       | 5/5 participants with “dramatic episodes of wheezing”                                                                                                                                    | 5/5 participants with reduction in number and severity of PVFM attacks                                                                                                                                               | NR, not calculable                          |
|             | Doshi & Weinberger (2006) | Descriptive                                  | Report of PVFM symptoms                       | 8/8 participants reported PVFM symptoms                                                                                                                                                  | <i>7/8 participants reported being asymptomatic</i>                                                                                                                                                                  | NR, not calculable                          |
|             | Maturo et al. (2011)      | Descriptive                                  | Report of PVFM symptoms and/or activity level | 56/56 participants with symptoms at rest or during exercise                                                                                                                              | 35/56 participants were asymptomatic and/or were able to return to activity.<br><br><i>These patients did not report any change in symptom or activity level at follow-up.</i>                                       | NR, not calculable                          |
|             |                           | Descriptive                                  | Report of PVFM symptoms and/or activity level | Initial speech therapy only group: 38/38 participants presented with PVFM symptoms.<br>Initial PPI only group: 7/7 participants presented with PVFM symptoms at rest or during exercise. | Initial speech therapy only group: 24/38 participants were asymptomatic and/or were able to return to activity.<br>Initial PPI only group: 0/7 participants were asymptomatic and/or were able to return to activity | $p = .001$                                  |

|                      | Descriptive  | Report of PVFM symptoms and/or activity level | Initial speech therapy only group: 38/38 participants presented with PVFM symptoms.<br>Speech therapy + PPI group: 6 participants presented with PVFM symptoms | Initial speech therapy only group: 24/38 participants were asymptomatic and/or were able to return to activity.<br>Speech therapy + PPI group: 5/6 participants were asymptomatic and/or were able to return to activity | $p = .65$                              |
|----------------------|--------------|-----------------------------------------------|----------------------------------------------------------------------------------------------------------------------------------------------------------------|--------------------------------------------------------------------------------------------------------------------------------------------------------------------------------------------------------------------------|----------------------------------------|
| Murry et al. (2004)  | Quantitative | FVC                                           | 2.36 -3.76 L (M=3.11 L);<br>83 – 105% predicted (M=92%)                                                                                                        | 2.33 – 3.81 L (M=3.18 L);<br>90 – 99% predicted (M=95%)                                                                                                                                                                  | NS                                     |
|                      | Quantitative | FIV <sub>5</sub> /FIVC                        | 0.32 – 0.7 (M=0.58)                                                                                                                                            | 0.89 – 0.99 (M=0.94)                                                                                                                                                                                                     | Significant ( $p$ -value not reported) |
| Murry et al. (2010)  | Descriptive  | Laryngoscopy                                  | 16/16 participants showed PVFM during oral and/or nasal quiet breathing                                                                                        | <i>12/16 participants showed PVFM resolution.<br/>3/16 participants showed improved PVFM.<br/>1/16 participants continued to show PVFM during quiet breathing</i>                                                        | NR, not calculable                     |
|                      | Descriptive  | Presence/absence of dyspnea                   | 7/16 clients with dyspnea present                                                                                                                              | <i>2/16 clients with dyspnea present</i>                                                                                                                                                                                 | $p > .01$ NS                           |
|                      | Descriptive  | Presence/absence of hoarseness                | 8/16 with complaints of hoarseness                                                                                                                             | <i>1/16 with complaints of hoarseness</i>                                                                                                                                                                                | $p \leq .01$                           |
| Powell et al. (2007) | Descriptive  | Report of PVFM symptoms                       | 14/14 participants with audible inspiratory stridor and 13/14 with additional PVFM symptoms                                                                    | 14/14 participants achieved resolution or significant improvement of PVFM symptoms                                                                                                                                       | NR, not calculable                     |
| Rameau et al. (2012) | Descriptive  | Report of PVFM symptoms                       | 22/22 participants with PVFM symptoms either with or without exercise                                                                                          | <i>19/22 participants reported improvement in PVFM symptom frequency or severity</i>                                                                                                                                     | NR, not calculable                     |
| Sullivan et al.      | Descriptive  | Report of PVFM                                | 20/20 participants reported                                                                                                                                    | <i>19/20 participants reported</i>                                                                                                                                                                                       | NR, not calculable                     |

|              |                           |             |                         |                                                                                                             |                                                                                                                                                                                                           |                    |
|--------------|---------------------------|-------------|-------------------------|-------------------------------------------------------------------------------------------------------------|-----------------------------------------------------------------------------------------------------------------------------------------------------------------------------------------------------------|--------------------|
|              | (2001)                    |             | symptoms                | PVFM symptoms during exercise                                                                               | <i>the ability to control symptoms</i><br><i>13/20 reported no PVFM episodes</i><br><i>6/20 reported one to three uncontrolled PVFM episodes</i><br><i>1/20 reported continued frequent PVFM episodes</i> |                    |
|              | Towey et al. (2012)       | Descriptive | Report of PVFM symptoms | 7/7 participants reported PVFM symptoms                                                                     | 7/7 participants reported PVFM symptom resolution                                                                                                                                                         | NR, not calculable |
| Case studies | Altman et al. (2000)      | Descriptive | Report of PVFM symptoms | Symptoms of PVFM                                                                                            | 1/2: Symptoms resolved or improved<br>1/2: No improvement or decline in symptoms                                                                                                                          | NR, not calculable |
|              | Archer et al. (2000)      | Descriptive | Report of PVFM symptoms | Symptoms of PVFM                                                                                            | No improvement or decline in symptoms                                                                                                                                                                     | NR, not calculable |
|              | Bahrainwala et al. (2001) | Descriptive | Report of PVFM symptoms | Symptoms of PVFM                                                                                            | Symptoms resolved or improved                                                                                                                                                                             | NR, not calculable |
|              |                           | Descriptive | Flow volume loops       | Attenuation of the inspiratory flow volume loop and abrupt drop and rise of the expiratory flow volume loop | Normal flow volume loops                                                                                                                                                                                  | NR, not calculable |
|              | Barnes et al. (1986)      | Descriptive | Report of PVFM symptoms | Symptoms of PVFM                                                                                            | No improvement or decline in symptoms                                                                                                                                                                     | NR, not calculable |
|              | Bittleman et al. (1994)   | Descriptive | Report of PVFM symptoms | Symptoms of PVFM                                                                                            | Symptoms resolved or improved                                                                                                                                                                             | NR, not calculable |
|              | Campaignha et al. (2012)  | Descriptive | Report of PVFM symptoms | Symptoms of PVFM                                                                                            | Symptoms resolved or improved                                                                                                                                                                             | NR, not calculable |
|              | Chawla et al. (1984)      | Descriptive | Report of PVFM symptoms | Symptoms of PVFM                                                                                            | No improvement or decline in symptoms                                                                                                                                                                     | NR, not calculable |
|              | Chiang et al. (2008)      | Descriptive | Report of PVFM symptoms | Symptoms of PVFM                                                                                            | Symptoms resolved or improved                                                                                                                                                                             | NR, not calculable |

|                          |              |                                                        |                                      |                                                                                         |                    |
|--------------------------|--------------|--------------------------------------------------------|--------------------------------------|-----------------------------------------------------------------------------------------|--------------------|
| Corren & Newman (1992)   | Descriptive  | Report of PVFM symptoms                                | Symptoms of PVFM                     | Symptoms resolved or improved                                                           | NR, not calculable |
| Craig et al. (1992)      | Descriptive  | Report of PVFM symptoms                                | Symptoms of PVFM                     | No improvement or decline in symptoms                                                   | NR, not calculable |
| Earles et al. (2003)     | Descriptive  | Report of PVFM symptoms                                | Symptoms of PVFM                     | Symptoms resolved or improved                                                           | NR, not calculable |
| Echternach et al. (2008) | Descriptive  | Report of PVFM symptoms                                | Symptoms of PVFM                     | Symptoms resolved or improved                                                           | NR, not calculable |
| Harbison et al. (2000)   | Descriptive  | Laryngoscopy                                           | Vocal fold adduction while breathing | Normal vocal fold motion                                                                | NR, not calculable |
|                          | Quantitative | PIFR                                                   | 36% predicted                        | 79%                                                                                     | NR, not calculable |
| Hatzelis & Murry (2012)  | Quantitative | Laryngoscopy                                           | >50% VF adduction on inspiration     | >50% VF adduction (at end of treatment)<br><50% VF adduction (at 1 and 3 mo. follow up) | NR, not calculable |
|                          | Quantitative | Dyspnea severity rating (based on 1-5 scale, 5=severe) | 4.5                                  | 2 (at end of treatment)<br>1.5 (at 1 mo. follow up)<br>1 (at 3 mo. and 1 yr. follow up) | NR, not calculable |
|                          | Quantitative | FVC                                                    | 4.82 L                               | 4.89 L                                                                                  | NR, not calculable |
|                          | Quantitative | % predicted value                                      | 107                                  | 109                                                                                     | NR, not calculable |
|                          | Quantitative | FIV <sub>5</sub> /FIVC                                 | .71                                  | .74                                                                                     | NR, not calculable |
|                          | Quantitative | FEV <sub>1</sub> /FVC                                  | .79                                  | .79                                                                                     | NR, not calculable |
| Hayes et al. (1993)      | Descriptive  | Report of PVFM symptoms                                | Symptoms of PVFM                     | 3/3: No improvement or decline in symptoms                                              | NR, not calculable |
| Kayani et al. (1998)     | Descriptive  | Report of PVFM symptoms                                | Symptoms of PVFM                     | 2/2: Symptoms resolved or improved                                                      | NR, not calculable |

|                           |              |                                 |                     |                                                                                                         |                    |
|---------------------------|--------------|---------------------------------|---------------------|---------------------------------------------------------------------------------------------------------|--------------------|
| Kivity et al. (1986)      | Descriptive  | Report of PVFM symptoms         | Symptoms of PVFM    | Symptoms resolved or improved                                                                           | NR, not calculable |
| Koester & Amundson (2002) | Descriptive  | Report of PVFM symptoms         | Symptoms of PVFM    | Symptoms resolved or improved                                                                           | NR, not calculable |
| Leo & Konakanchi (1999)   | Descriptive  | Report of PVFM symptoms         | Symptoms of PVFM    | Symptoms resolved or improved                                                                           | NR, not calculable |
| Marsh et al. (1994)       | Descriptive  | Report of PVFM symptoms         | Symptoms of PVFM    | Symptoms resolved or improved                                                                           | NR, not calculable |
| Maschka et al. (1997)     | Descriptive  | Report of PVFM symptoms         | Symptoms of PVFM    | 1/2: No improvement or decline in symptoms<br>1/2: Symptoms resolved or improved                        | NR, not calculable |
| Mathers-Schmidt (2001)    | Descriptive  | Report of PVFM symptoms         | Symptoms of PVFM    | 1/2: Symptoms resolved or improved<br>1/2: No improvement or decline in symptoms                        | NR, not calculable |
| Mobeireek et al. (1995)   | Descriptive  | Report of PVFM symptoms         | Symptoms of PVFM    | 2/2: Symptoms resolved or improved                                                                      | NR, not calculable |
| Mullinax & Kuhn (1996)    | Descriptive  | Report of PVFM symptoms         | Symptoms of PVFM    | Symptoms resolved or improved                                                                           | NR, not calculable |
| Murry (1998)              | Quantitative | Speaking F <sub>0</sub> (range) | 191 Hz (178-216 Hz) | 201 Hz (188-242 Hz)                                                                                     | NR, not calculable |
|                           | Quantitative | Sustained /a/                   | 9 seconds           | 16 seconds                                                                                              | NR, not calculable |
| Nacci et al. (2007)       | Descriptive  | Report of PVFM symptoms         | Symptoms of PVFM    | 3/3: Symptoms resolved or improved                                                                      | NR, not calculable |
| Niven et al. (1992)       | Descriptive  | Report of PVFM symptoms         | Symptoms of PVFM    | 1/3: No improvement or decline in symptoms (Case 1)<br>2/3: Symptoms resolved or improved (Cases 2 & 3) | NR, not calculable |

|                           |              |                                                |                                                |                                           |                    |
|---------------------------|--------------|------------------------------------------------|------------------------------------------------|-------------------------------------------|--------------------|
| Pinho et al. (1997)       | Descriptive  | Laryngoscopy                                   | Atypical movements of the arytenoid cartilages | Paradoxical arytenoid movement controlled | NR, not calculable |
|                           | Descriptive  | Report of PVFM symptoms                        | Symptoms of PVFM                               | Symptoms resolved or improved             | NR, not calculable |
| Reisner & Nelson (1997)   | Descriptive  | Report of PVFM symptoms                        | Symptoms of PVFM                               | 4/4: Symptoms resolved or improved        | NR, not calculable |
| Renz et al. (2000)        | Descriptive  | Report of PVFM symptoms                        | Symptoms of PVFM                               | 2/2: Symptoms resolved or improved        | NR, not calculable |
| Rhodes (2008)             | Descriptive  | Report of PVFM symptoms                        | Symptoms of PVFM                               | Symptoms resolved or improved             | NR, not calculable |
| Rogers & Stell (1978)     | Descriptive  | Report of PVFM symptoms                        | Symptoms of PVFM                               | 2/2 Symptoms resolved or improved         | NR, not calculable |
| Ruddy et al. (2004)       | Quantitative | Dyspnea ratings (based on 0-5 scale, 5=severe) | 5                                              | 1.5                                       | NR, not calculable |
|                           | Quantitative | Maximum inspiratory pressure                   | 73 cm H <sub>2</sub> O                         | 166 cm H <sub>2</sub> O                   | NR, not calculable |
|                           | Quantitative | Maximum duration of rowing activity            | 0 minutes                                      | 18 minutes                                | NR, not calculable |
| Rusakow et al. (1991)     | Descriptive  | Report of PVFM symptoms                        | Symptoms of PVFM                               | Symptoms resolved or improved             | NR, not calculable |
| Sandage & Zelanzny (2004) | Descriptive  | Report of PVFM symptoms                        | Symptoms of PVFM                               | Symptoms resolved or improved             | NR, not calculable |
| Sette et al. (1993)       | Descriptive  | Report of PVFM symptoms                        | Symptoms of PVFM                               | Symptoms resolved or improved             | NR, not calculable |
| Shao et al. (1995)        | Descriptive  | Pulmonary function test                        | Reduced inspiratory flow rate                  | Normal flow volume curve                  | NR, not calculable |
|                           | Descriptive  | Report of PVFM symptoms                        | Symptoms of PVFM                               | Symptoms resolved or improved             | NR, not calculable |
| Sharma &                  | Descriptive  | Report of PVFM                                 | Symptoms of PVFM                               | Symptoms resolved or                      | NR, not calculable |

|                             |             |                         |                  |                                                                                  |                    |
|-----------------------------|-------------|-------------------------|------------------|----------------------------------------------------------------------------------|--------------------|
| Singh (2007)                |             | symptoms                |                  | improved                                                                         |                    |
| Skinner & Bradley (1989)    | Descriptive | Report of PVFM symptoms | Symptoms of PVFM | Symptoms resolved or improved                                                    | NR, not calculable |
| Smith et al. (1993)         | Descriptive | Report of PVFM symptoms | Symptoms of PVFM | Symptoms resolved or improved                                                    | NR, not calculable |
| Suri et al. (2002)          | Descriptive | Report of PVFM symptoms | Symptoms of PVFM | No improvement or decline in symptoms                                            | NR, not calculable |
| Suttithawil et al. (2006)   | Descriptive | Report of PVFM symptoms | Symptoms of PVFM | Symptoms resolved or improved                                                    | NR, not calculable |
| Tajchman & Gitterman (1996) | Descriptive | Report of PVFM symptoms | Symptoms of PVFM | Symptoms resolved or improved                                                    | NR, not calculable |
| Tan et al. (1997)           | Descriptive | Report of PVFM symptoms | Symptoms of PVFM | Symptoms resolved or improved                                                    | NR, not calculable |
| Tilles (2010)               | Descriptive | Report of PVFM symptoms | Symptoms of PVFM | Symptoms resolved or improved                                                    | NR, not calculable |
| Von Berg et al. (1999)      | Descriptive | Report of PVFM symptoms | Symptoms of PVFM | 2/2: Symptoms resolved or improved                                               | NR, not calculable |
| Walaschek et al. (2010)     | Descriptive | Report of PVFM symptoms | Symptoms of PVFM | Symptoms resolved or improved                                                    | NR, not calculable |
| Warnes & Allen (2005)       | Descriptive | Report of PVFM symptoms | Symptoms of PVFM | No improvement or decline in symptoms                                            | NR, not calculable |
| Weir (2002)                 | Descriptive | Report of PVFM symptoms | Symptoms of PVFM | 2/2: Symptoms resolved or improved                                               | NR, not calculable |
| Wilson et al. (2009)        | Descriptive | Report of PVFM symptoms | Symptoms of PVFM | 1/2: Symptoms resolved or improved<br>1/2: No improvement or decline in symptoms | NR, not calculable |

*Note.* cm H<sub>2</sub>O= centimeters water; FENO = fractional expired nitric oxide; FEV<sub>1</sub>= forced expiratory volume in 1 second; FIF<sub>50</sub>= forced inspiratory flow at 50% of the vital capacity; FIV.5 (FIV<sub>1</sub>)= forced inspiratory vital capacity in the first .5 second (1 second); FIVC= forced total inspiratory vital capacity; F<sub>0</sub>= fundamental frequency; FVC= forced vital capacity; Hz= hertz; IQR= interquartile range; L= liters; M= mean; NR= not reported; NS= not significant; PIFR= peak inspiratory flow rate; PPI= proton pump inhibitor;



---

PVFM= paradoxical vocal fold movement; SEM= standard error of measurement; tx= treatment; VF= vocal folds.

Table S3

*State of the Evidence Pertaining to SLP Treatment for Individuals with PVFM: Group Design Critical Appraisal*

| Citation                  | Study design               | Study protocol | Blinding | Sampling | Allocation | Baseline comparability/<br>patient description | Treatment fidelity | Significance | Precision | Intention to treat |
|---------------------------|----------------------------|----------------|----------|----------|------------|------------------------------------------------|--------------------|--------------|-----------|--------------------|
| Chiang et al. (2013)      | Retrospective case series  | √              | X        | X        | NA         | √                                              | X                  | X            | X         | NA                 |
| Christopher et al. (1983) | Retrospective case series  | X              | X        | X        | NA         | √                                              | X                  | X            | X         | NA                 |
| Doshi et al. (2004)       | Retrospective case series  | X              | X        | X        | NA         | √                                              | X                  | X            | X         | NA                 |
| Maturo et al. (2011)      | Retrospective case series  | √              | X        | X        | NA         | X                                              | X                  | √            | X         | NA                 |
| Murry et al. (2010)       | Retrospective case series  | √              | X        | X        | NA         | √                                              | X                  | √            | X         | NA                 |
| Murry et al. (2004)       | Retrospective case series  | √              | X        | X        | NA         | √                                              | X                  | √            | X         | NA                 |
| Murry et al. (2006)       | Prospective pre-post study | √              | X        | X        | NA         | X                                              | X                  | √            | X         | NA                 |
| Nacci et al. (2011)       | RCT                        | √              | X        | X        | Random, ID | √                                              | X                  | √            | X         | X                  |
| Powell et al. (2007)      | Retrospective case series  | √              | X        | X        | NA         | √                                              | X                  | X            | X         | NA                 |
| Rameau et al. (2012)      | Retrospective case series  | √              | X        | X        | NA         | √                                              | X                  | X            | X         | NA                 |
| Ryan et al. (2009)        | Prospective pre-post study | √              | X        | X        | NA         | √                                              | X                  | √            | X         | NA                 |
| Sullivan et               | Retrospective              | √              | X        | X        | NA         | √                                              | X                  | X            | X         | NA                 |

---

|              |                           |   |   |   |    |   |   |   |   |    |
|--------------|---------------------------|---|---|---|----|---|---|---|---|----|
| al. (2001)   | case series               |   |   |   |    |   |   |   |   |    |
| Towey (2012) | Retrospective case series | X | X | X | NA | √ | X | X | X | NA |

---

*Note.* Evaluated using a modification of ASHA’s critical appraisal scheme (Cherney, Patterson, Raymer, Frymark, & Schooling, 2008). Critical appraisal information for Mathers-Schmidt & Brilla (2005) and Vertigan et al. (2008) included in full manuscript, Tables 3 and 4. ID= inadequately described; NA= not applicable; RCT= randomized controlled trial.

Table S4

*Expanded Keyword Search String*

| Date                                                                                                     | Database       | Search String                                                                                                                                                                                                                                                                                                                                                                                                                                                                                                                                                    | Yield |
|----------------------------------------------------------------------------------------------------------|----------------|------------------------------------------------------------------------------------------------------------------------------------------------------------------------------------------------------------------------------------------------------------------------------------------------------------------------------------------------------------------------------------------------------------------------------------------------------------------------------------------------------------------------------------------------------------------|-------|
| 3/19/13,<br>3/20/13,<br>3/22/13,<br>3/26/13,<br>3/27/13, 4/3/13,<br>4/4/13, 4/12/13,<br>4/18/13, 4/19/13 | PubMed         | ("Vocal Cords"[Mesh] OR "Laryngeal Diseases"[Mesh]) AND ("Psychotherapy"[Mesh] OR "Treatment Outcome"[Mesh] OR "Gastroesophageal Reflux"[Mesh] OR "Breathing Exercises"[Mesh] OR "Asthma"[Mesh] OR "Respiration Disorders"[Mesh] OR "Rehabilitation of Speech and Language Disorders"[Mesh]) AND (motion OR malfunction OR dysfunction OR syndrome OR paradoxical OR irritable OR spasm* OR asthma OR stridor OR croup OR dystonia OR adduct* OR cough OR wheez* OR tense OR tension)<br><br>Mesh: Medical Subject Heading<br>Filters activated: Humans, English | 3004  |
| 4/19/13                                                                                                  | PubMed         | ("laryngeal dyskinesia" OR "laryngeal dyskinesia" OR (Munchausen AND stridor) OR "irritable larynx" OR "functional airway obstruction" OR "paroxysmal laryngospasm" OR "inspiratory adduction" OR "laryngeal dysfunction" OR "laryngeal wheezing" OR "functional upper airway obstruction") AND (treatment OR therapy OR exercise OR biofeedback OR technique OR rehabilitation OR awareness OR control OR train* OR support OR relax OR cough OR sniff)<br><br>Same limits                                                                                      | 119   |
| 4/19/13,<br>4/22/13, 4/23/13                                                                             | PubMed         | ((("vocal cord" OR "vocal fold") AND (movement OR dysfunction OR motion OR malfunction OR obstruction)) AND (treatment OR therapy OR exercise OR biofeedback OR technique OR rehabilitation OR awareness OR control OR train* OR support OR relax OR cough OR sniff))<br><br>Same limits                                                                                                                                                                                                                                                                         | 1918  |
| 4/25/13                                                                                                  | PubMed         | "Cough"[Mesh] AND ("vocal cord " OR "vocal fold")<br><br>Same limits                                                                                                                                                                                                                                                                                                                                                                                                                                                                                             | 72    |
| 4/25/13, 4/26/13                                                                                         | PubMed         | ("chronic cough" OR pseudoasthma OR ((false OR fictitious OR mimic* OR hysteric* OR fake) AND asthma) )AND (behavior OR behavioral OR exercise OR biofeedback OR technique OR rehabilitation OR awareness OR control OR train* OR (breath AND support) OR relax OR sniff)<br><br>Same limits                                                                                                                                                                                                                                                                     | 885   |
| 5/8/13, 5/9/13                                                                                           | CINAHL (EBSCO) | ((MH "Vocal Cords") OR (MH "Laryngeal Diseases+") OR (MH "Cough")) AND (motion OR movement OR malfunction OR dysfunction OR obstruction OR syndrome OR paradoxical OR irritable OR spasm* OR asthma OR stridor OR croup OR dystonia OR adduct* OR wheez* OR tense OR tension) AND (treatment OR therapy OR exercise OR biofeedback OR technique OR rehabilitation OR awareness OR control OR train* OR support OR relax OR cough OR sniff)<br><br>MH: Major Heading<br>Limits: English Language, Peer Reviewed, Human                                            | 672   |

|                  |                                |                                                                                                                                                                                                                                                                                                                                                                                                                                                                                                                                                                                                                                                                                     |     |
|------------------|--------------------------------|-------------------------------------------------------------------------------------------------------------------------------------------------------------------------------------------------------------------------------------------------------------------------------------------------------------------------------------------------------------------------------------------------------------------------------------------------------------------------------------------------------------------------------------------------------------------------------------------------------------------------------------------------------------------------------------|-----|
| 5/9/13           | CINAHL                         | ("laryngeal dyskinesia" OR "laryngeal dyskinesia" OR (Munchausen AND stridor) OR "irritable larynx" OR "functional airway obstruction" OR "paroxysmal laryngospasm" OR "inspiratory adduction" OR "laryngeal dysfunction" OR "laryngeal wheezing" OR "functional upper airway obstruction") AND (treatment OR therapy OR exercise OR biofeedback OR technique OR rehabilitation OR awareness OR control OR train* OR support OR relax OR cough OR sniff)                                                                                                                                                                                                                            | 11  |
| Same limits      |                                |                                                                                                                                                                                                                                                                                                                                                                                                                                                                                                                                                                                                                                                                                     |     |
| 5/9/13, 5/10/13  | CINAHL                         | ("vocal cord" OR "vocal fold") and (motion OR movement OR malfunction OR dysfunction OR obstruction OR syndrome OR paradoxical OR irritable OR spasm* OR asthma OR stridor OR croup OR dystonia OR adduct* OR wheez* OR tense OR tension) AND (treatment OR therapy OR exercise OR biofeedback OR technique OR rehabilitation OR awareness OR control OR train* OR support OR relax OR cough OR sniff)                                                                                                                                                                                                                                                                              | 165 |
| Same limits      |                                |                                                                                                                                                                                                                                                                                                                                                                                                                                                                                                                                                                                                                                                                                     |     |
| 5/10/13          | CINAHL                         | ("chronic cough" OR pseudoasthma OR ((false OR fictitious OR mimic* OR hysteric* OR fake) AND asthma)) AND (behavior OR behavioral OR exercise OR biofeedback OR technique OR rehabilitation OR awareness OR control OR train* OR (breath AND support) OR relax OR sniff)                                                                                                                                                                                                                                                                                                                                                                                                           | 69  |
| Same limits      |                                |                                                                                                                                                                                                                                                                                                                                                                                                                                                                                                                                                                                                                                                                                     |     |
| 5/10/13, 5/13/13 | Health Source: Nursing (EBSCO) | (DE "LARYNX -- Diseases" OR DE "LARYNGEAL edema" OR DE "LARYNGISMUS stridulus" OR DE "LARYNGITIS" OR DE "LARYNX -- Radiography" OR DE "LARYNX -- Stenosis" OR DE "VOICE disorders" OR DE "VOCAL cords" OR DE "VOCAL sac" OR DE "COUGH") AND (motion OR movement OR malfunction OR dysfunction OR obstruction OR syndrome OR paradoxical OR irritable OR spasm* OR asthma OR stridor OR croup OR dystonia OR adduct* OR wheez* OR tense OR tension) AND (treatment OR therapy OR exercise OR biofeedback OR technique OR rehabilitation OR awareness OR control OR train* OR support OR relax OR cough OR sniff)<br>DE: Thesaurus term<br>Limits: Scholarly (Peer Reviewed) Journals | 370 |
| 5/13/13          | Health Source: Nursing         | ("laryngeal dyskinesia" OR "laryngeal dyskinesia" OR (Munchausen AND stridor) OR "irritable larynx" OR "functional airway obstruction" OR "paroxysmal laryngospasm" OR "inspiratory adduction" OR "laryngeal dysfunction" OR "laryngeal wheezing" OR "functional upper airway obstruction") AND (treatment OR therapy OR exercise OR biofeedback OR technique OR rehabilitation OR awareness OR control OR train* OR support OR relax OR cough OR sniff)                                                                                                                                                                                                                            | 6   |
| Same limits      |                                |                                                                                                                                                                                                                                                                                                                                                                                                                                                                                                                                                                                                                                                                                     |     |
| 5/13/13          | Health Source: Nursing         | ("vocal cord" OR "vocal fold") and (motion OR movement OR malfunction OR dysfunction OR obstruction OR syndrome OR paradoxical OR irritable OR spasm* OR asthma OR stridor OR croup OR dystonia OR adduct* OR wheez* OR tense OR tension) AND (treatment OR therapy OR exercise OR biofeedback OR technique OR rehabilitation OR awareness OR control OR train* OR support OR relax OR cough OR sniff)                                                                                                                                                                                                                                                                              | 150 |
| Same limits      |                                |                                                                                                                                                                                                                                                                                                                                                                                                                                                                                                                                                                                                                                                                                     |     |
| 5/13/13          | Health Source: Nursing         | ("chronic cough" OR pseudoasthma OR ((false OR fictitious OR mimic* OR hysteric* OR fake) AND                                                                                                                                                                                                                                                                                                                                                                                                                                                                                                                                                                                       | 105 |

|         |                                             |                                                                                                                                                                                                                                                                                                                                                                                                                                                                                                                                                                                                                                                                                                                    |     |
|---------|---------------------------------------------|--------------------------------------------------------------------------------------------------------------------------------------------------------------------------------------------------------------------------------------------------------------------------------------------------------------------------------------------------------------------------------------------------------------------------------------------------------------------------------------------------------------------------------------------------------------------------------------------------------------------------------------------------------------------------------------------------------------------|-----|
|         |                                             | asthma)) AND (behavior OR behavioral OR exercise OR biofeedback OR technique OR rehabilitation OR awareness OR control OR train* OR (breath AND support) OR relax OR sniff)                                                                                                                                                                                                                                                                                                                                                                                                                                                                                                                                        |     |
|         |                                             | Same limits                                                                                                                                                                                                                                                                                                                                                                                                                                                                                                                                                                                                                                                                                                        |     |
| 5/13/13 | Communication & Mass Media Complete (EBSCO) | (DE "VOCAL cords" OR DE "VOCAL sac" OR DE "LARYNX" OR DE "ARTIFICIAL larynges" OR DE "GLOTTIS" OR DE "VOICE" OR DE "AUTOMATIC speech recognition" OR DE "FORMANTS (Speech)" OR DE "NASALITY (Phonetics)" OR DE "NORMAL voice" OR DE "SONORANTS (Phonetics)" OR DE "VOCAL registers" OR DE "VOICE analysis" OR DE "VOICE misappropriation") AND (motion OR movement OR malfunction OR dysfunction OR obstruction OR syndrome OR paradoxical OR irritable OR spasm* OR asthma OR stridor OR croup OR dystonia OR adduct* OR wheez* OR tense OR tension) AND (treatment OR therapy OR exercise OR biofeedback OR technique OR rehabilitation OR awareness OR control OR train* OR support OR relax OR cough OR sniff) | 135 |
|         |                                             | DE: Thesaurus term<br>Limits: Scholarly (Peer Reviewed) Journals                                                                                                                                                                                                                                                                                                                                                                                                                                                                                                                                                                                                                                                   |     |
| 5/14/13 | Communication & Mass Media Complete         | ("laryngeal dyskinesia" OR "laryngeal dyskinesia" OR (Munchausen AND stridor) OR "irritable larynx" OR "functional airway obstruction" OR "paroxysmal laryngospasm" OR "inspiratory adduction" OR "laryngeal dysfunction" OR "laryngeal wheezing" OR "functional upper airway obstruction") AND (treatment OR therapy OR exercise OR biofeedback OR technique OR rehabilitation OR awareness OR control OR train* OR support OR relax OR cough OR sniff)                                                                                                                                                                                                                                                           | 2   |
|         |                                             | Same limits                                                                                                                                                                                                                                                                                                                                                                                                                                                                                                                                                                                                                                                                                                        |     |
| 5/14/13 | Communication & Mass Media Complete         | ("laryngeal dyskinesia" OR "laryngeal dyskinesia" OR (Munchausen AND stridor) OR "irritable larynx" OR "functional airway obstruction" OR "paroxysmal laryngospasm" OR "inspiratory adduction" OR "laryngeal dysfunction" OR "laryngeal wheezing" OR "functional upper airway obstruction")                                                                                                                                                                                                                                                                                                                                                                                                                        | 5   |
|         |                                             | Same limits                                                                                                                                                                                                                                                                                                                                                                                                                                                                                                                                                                                                                                                                                                        |     |
| 5/14/13 | Communication & Mass Media Complete         | ("vocal cord" OR "vocal fold") and (motion OR movement OR malfunction OR dysfunction OR obstruction OR syndrome OR paradoxical OR irritable OR spasm* OR asthma OR stridor OR croup OR dystonia OR adduct* OR wheez* OR tense OR tension) AND (treatment OR therapy OR exercise OR biofeedback OR technique OR rehabilitation OR awareness OR control OR train* OR support OR relax OR cough OR sniff)                                                                                                                                                                                                                                                                                                             | 68  |
|         |                                             | Same limits                                                                                                                                                                                                                                                                                                                                                                                                                                                                                                                                                                                                                                                                                                        |     |
| 5/14/13 | Communication & Mass Media Complete         | ("chronic cough" OR pseudoasthma OR ((false OR fictitious OR mimic* OR hysteric* OR fake) AND asthma)) AND (behavior OR behavioral OR exercise OR biofeedback OR technique OR rehabilitation OR awareness OR control OR train* OR (breath AND support) OR relax OR sniff)                                                                                                                                                                                                                                                                                                                                                                                                                                          | 3   |
|         |                                             | Same limits                                                                                                                                                                                                                                                                                                                                                                                                                                                                                                                                                                                                                                                                                                        |     |
| 5/14/13 | Communication & Mass Media Complete         | ("chronic cough" OR pseudoasthma OR ((false OR fictitious OR mimic* OR hysteric* OR fake) AND asthma))                                                                                                                                                                                                                                                                                                                                                                                                                                                                                                                                                                                                             | 7   |
|         |                                             | Same limits                                                                                                                                                                                                                                                                                                                                                                                                                                                                                                                                                                                                                                                                                                        |     |

|         |                                                       |                                                                                                                                                                                                                                                                                                                                                                                                                                                                                                                                             |     |
|---------|-------------------------------------------------------|---------------------------------------------------------------------------------------------------------------------------------------------------------------------------------------------------------------------------------------------------------------------------------------------------------------------------------------------------------------------------------------------------------------------------------------------------------------------------------------------------------------------------------------------|-----|
| 5/15/13 | Education Research Complete (EBSCO)                   | (DE "VOCAL cords" OR DE "VOICE Disorders") AND (motion OR movement OR malfunction OR dysfunction OR obstruction OR syndrome OR paradoxical OR irritable OR spasm* OR asthma OR stridor OR croup OR dystonia OR adduct* OR wheez* OR tense OR tension) AND (treatment OR therapy OR exercise OR biofeedback OR technique OR rehabilitation OR awareness OR control OR train* OR support OR relax OR cough OR sniff)                                                                                                                          | 147 |
|         |                                                       | DE: Subject term<br>Limits: Scholarly (Peer Reviewed) Journals                                                                                                                                                                                                                                                                                                                                                                                                                                                                              |     |
| 5/15/13 | Education Research Complete                           | ("vocal cord" OR "vocal fold") and (motion OR movement OR malfunction OR dysfunction OR obstruction OR syndrome OR paradoxical OR irritable OR spasm* OR asthma OR stridor OR croup OR dystonia OR adduct* OR wheez* OR tense OR tension) AND (treatment OR therapy OR exercise OR biofeedback OR technique OR rehabilitation OR awareness OR control OR train* OR support OR relax OR cough OR sniff)                                                                                                                                      | 40  |
|         |                                                       | Same limits                                                                                                                                                                                                                                                                                                                                                                                                                                                                                                                                 |     |
| 5/15/13 | Education Research Complete                           | ("laryngeal dyskinesia" OR "laryngeal dyskinesia" OR (Munchausen AND stridor) OR "irritable larynx" OR "functional airway obstruction" OR "paroxysmal laryngospasm" OR "inspiratory adduction" OR "laryngeal dysfunction" OR "laryngeal wheezing" OR "functional upper airway obstruction")                                                                                                                                                                                                                                                 | 3   |
|         |                                                       | Same limits                                                                                                                                                                                                                                                                                                                                                                                                                                                                                                                                 |     |
| 5/15/13 | Education Research Complete                           | ("chronic cough" OR pseudoasthma OR ((false OR fictitious OR mimic* OR hysteric* OR fake) AND asthma))                                                                                                                                                                                                                                                                                                                                                                                                                                      | 33  |
|         |                                                       | Same limits                                                                                                                                                                                                                                                                                                                                                                                                                                                                                                                                 |     |
| 5/15/13 | Psychology and Behavioral Sciences Collection (EBSCO) | (DE "VOICE disorders" OR DE "LARYNX -- Diseases" OR DE "LARYNGEAL edema" OR DE "LARYNGISMUS stridulus" OR DE "LARYNGITIS" OR DE "LARYNX -- Stenosis" OR DE "COUGH") AND (motion OR movement OR malfunction OR dysfunction OR obstruction OR syndrome OR paradoxical OR irritable OR spasm* OR asthma OR stridor OR croup OR dystonia OR adduct* OR wheez* OR tense OR tension) AND (treatment OR therapy OR exercise OR biofeedback OR technique OR rehabilitation OR awareness OR control OR train* OR support OR relax OR cough OR sniff) | 107 |
|         |                                                       | DE: Subject term<br>Limits: Peer Reviewed Journals                                                                                                                                                                                                                                                                                                                                                                                                                                                                                          |     |
| 5/15/13 | Psychology and Behavioral Sciences Collection         | ("vocal cord" OR "vocal fold") and (motion OR movement OR malfunction OR dysfunction OR obstruction OR syndrome OR paradoxical OR irritable OR spasm* OR asthma OR stridor OR croup OR dystonia OR adduct* OR wheez* OR tense OR tension) AND (treatment OR therapy OR exercise OR biofeedback OR technique OR rehabilitation OR awareness OR control OR train* OR support OR relax OR cough OR sniff)                                                                                                                                      | 87  |
|         |                                                       | Same limits                                                                                                                                                                                                                                                                                                                                                                                                                                                                                                                                 |     |
| 5/15/13 | Psychology and Behavioral Sciences Collection         | ("laryngeal dyskinesia" OR "laryngeal dyskinesia" OR (Munchausen AND stridor) OR "irritable larynx" OR "functional airway obstruction" OR "paroxysmal laryngospasm" OR "inspiratory adduction" OR                                                                                                                                                                                                                                                                                                                                           | 5   |

|                  |                                               |                                                                                                                                                                                                                                                                                                                                                                                                                                             |     |
|------------------|-----------------------------------------------|---------------------------------------------------------------------------------------------------------------------------------------------------------------------------------------------------------------------------------------------------------------------------------------------------------------------------------------------------------------------------------------------------------------------------------------------|-----|
|                  |                                               | "laryngeal dysfunction" OR "laryngeal wheezing" OR "functional upper airway obstruction")                                                                                                                                                                                                                                                                                                                                                   |     |
|                  |                                               | Same limits                                                                                                                                                                                                                                                                                                                                                                                                                                 |     |
| 5/15/13          | Psychology and Behavioral Sciences Collection | ("chronic cough" OR pseudoasthma OR ((false OR fictitious OR mimic* OR hysteric* OR fake) AND asthma))                                                                                                                                                                                                                                                                                                                                      | 92  |
|                  |                                               | Same limits                                                                                                                                                                                                                                                                                                                                                                                                                                 |     |
| 5/15/13, 5/16/13 | PsycINFO (EBSCO)                              | (DE "Laryngeal Disorders" OR DE "Dysphonia" OR DE "Voice" OR cough) AND (motion OR movement OR malfunction OR dysfunction OR obstruction OR syndrome OR paradoxical OR irritable OR spasm* OR asthma OR stridor OR croup OR dystonia OR adduct* OR wheez* OR tense OR tension) AND (treatment OR therapy OR exercise OR biofeedback OR technique OR rehabilitation OR awareness OR control OR train* OR support OR relax OR cough OR sniff) | 349 |
|                  |                                               | DE: Subject term<br>Limits: Peer Reviewed Journals; English                                                                                                                                                                                                                                                                                                                                                                                 |     |
| 5/16/13          | PsycINFO                                      | ("vocal cord" OR "vocal fold") and (motion OR movement OR malfunction OR dysfunction OR obstruction OR syndrome OR paradoxical OR irritable OR spasm* OR asthma OR stridor OR croup OR dystonia OR adduct* OR wheez* OR tense OR tension) AND (treatment OR therapy OR exercise OR biofeedback OR technique OR rehabilitation OR awareness OR control OR train* OR support OR relax OR cough OR sniff)                                      | 81  |
|                  |                                               | Same limits                                                                                                                                                                                                                                                                                                                                                                                                                                 |     |
| 5/16/13          | PsycINFO                                      | ("laryngeal dyskinesia" OR "laryngeal dyskinesia" OR (Munchausen AND stridor) OR "irritable larynx" OR "functional airway obstruction" OR "paroxysmal laryngospasm" OR "inspiratory adduction" OR "laryngeal dysfunction" OR "laryngeal wheezing" OR "functional upper airway obstruction")                                                                                                                                                 | 8   |
|                  |                                               | Same limits                                                                                                                                                                                                                                                                                                                                                                                                                                 |     |
| 5/16/13          | PsycINFO                                      | ("chronic cough" OR pseudoasthma OR ((false OR fictitious OR mimic* OR hysteric* OR fake) AND asthma))                                                                                                                                                                                                                                                                                                                                      | 58  |
|                  |                                               | Same limits                                                                                                                                                                                                                                                                                                                                                                                                                                 |     |
| 5/16/13          | PsycINFO                                      | (DE "Speech Disorders") AND (motion OR movement OR malfunction OR dysfunction OR obstruction OR syndrome OR paradoxical OR irritable OR spasm* OR asthma OR stridor OR croup OR dystonia OR adduct* OR wheez* OR tense OR tension) AND (treatment OR therapy OR exercise OR biofeedback OR technique OR rehabilitation OR awareness OR control OR train* OR support OR relax OR cough OR sniff)                                             | 195 |
|                  |                                               | Same limits                                                                                                                                                                                                                                                                                                                                                                                                                                 |     |
| 5/16/13          | Teacher Reference Center (EBSCO)              | ("vocal cord" OR "vocal fold" OR voice OR cough) and (motion OR movement OR malfunction OR dysfunction OR obstruction OR syndrome OR paradoxical OR irritable OR spasm* OR asthma OR stridor OR croup OR dystonia OR adduct* OR wheez* OR tense OR tension) AND (treatment OR therapy OR exercise OR biofeedback OR technique OR rehabilitation OR awareness OR control OR train* OR support OR relax OR cough OR sniff)                    | 66  |



|                  |                                                     |                                                                                                                                                                                                                                                                                                                                                                                                                                                                                                              |     |
|------------------|-----------------------------------------------------|--------------------------------------------------------------------------------------------------------------------------------------------------------------------------------------------------------------------------------------------------------------------------------------------------------------------------------------------------------------------------------------------------------------------------------------------------------------------------------------------------------------|-----|
|                  |                                                     | Limits: Peer reviewed                                                                                                                                                                                                                                                                                                                                                                                                                                                                                        |     |
| 5/16/13          | Teacher Reference Center                            | ("laryngeal dyskinesia" OR "laryngeal dyskinesia" OR (Munchausen AND stridor) OR "irritable larynx" OR "functional airway obstruction" OR "paroxysmal laryngospasm" OR "inspiratory adduction" OR "laryngeal dysfunction" OR "laryngeal wheezing" OR "functional upper airway obstruction")                                                                                                                                                                                                                  | 0   |
|                  |                                                     | Same limits                                                                                                                                                                                                                                                                                                                                                                                                                                                                                                  |     |
| 5/16/13          | Teacher Reference Center                            | ("chronic cough" OR pseudoasthma OR ((false OR fictitious OR mimic* OR hysteric* OR fake) AND asthma))                                                                                                                                                                                                                                                                                                                                                                                                       | 2   |
|                  |                                                     | Same limits                                                                                                                                                                                                                                                                                                                                                                                                                                                                                                  |     |
| 5/16/13          | ComDisDome (ProQuest)                               | (SU.EXACT("Subglottic Area") OR SU.EXACT("Vocal Folds") OR SU.EXACT("Laryngeal Structure Involvement") OR SU.EXACT("Chronic Cough")) AND (motion OR movement OR malfunction OR dysfunction OR obstruction OR syndrome OR paradoxical OR irritable OR spasm* OR asthma OR stridor OR croup OR dystonia OR adduct* OR wheez* OR tense OR tension) AND (treatment OR therapy OR exercise OR biofeedback OR technique OR rehabilitation OR awareness OR control OR train* OR support OR relax OR cough OR sniff) | 0   |
|                  |                                                     | SU.EXACT: Subject heading<br>Limits: Peer reviewed, English                                                                                                                                                                                                                                                                                                                                                                                                                                                  |     |
| 5/16/13, 5/17/13 | ComDisDome                                          | ("vocal cord" OR "vocal fold") and (motion OR movement OR malfunction OR dysfunction OR obstruction OR syndrome OR paradoxical OR irritable OR spasm* OR asthma OR stridor OR croup OR dystonia OR adduct* OR wheez* OR tense OR tension) AND (treatment OR therapy OR exercise OR biofeedback OR technique OR rehabilitation OR awareness OR control OR train* OR support OR relax OR cough OR sniff)                                                                                                       | 420 |
|                  |                                                     | Same limits                                                                                                                                                                                                                                                                                                                                                                                                                                                                                                  |     |
| 5/17/13          | ComDisDome                                          | ("laryngeal dyskinesia" OR "laryngeal dyskinesia" OR (Munchausen AND stridor) OR "irritable larynx" OR "functional airway obstruction" OR "paroxysmal laryngospasm" OR "inspiratory adduction" OR "laryngeal dysfunction" OR "laryngeal wheezing" OR "functional upper airway obstruction") AND (treatment OR therapy OR exercise OR biofeedback OR technique OR rehabilitation OR awareness OR control OR train* OR support OR relax OR cough OR sniff)                                                     | 41  |
|                  |                                                     | Same limits                                                                                                                                                                                                                                                                                                                                                                                                                                                                                                  |     |
| 5/17/13          | ComDisDome                                          | ("chronic cough" OR pseudoasthma OR ((false OR fictitious OR mimic* OR hysteric* OR fake) AND asthma)) AND (treatment OR therapy OR exercise OR biofeedback OR technique OR rehabilitation OR awareness OR control OR train* OR support OR relax OR cough OR sniff)                                                                                                                                                                                                                                          | 71  |
|                  |                                                     | Same limits                                                                                                                                                                                                                                                                                                                                                                                                                                                                                                  |     |
| 5/17/13          | Linguistics Language Behaviour Abstracts (ProQuest) | (SU.EXACT("Vocal Folds") OR SU.EXACT("Vocal Tract") OR SU.EXACT("Phonation Structures"))                                                                                                                                                                                                                                                                                                                                                                                                                     | 2   |
|                  |                                                     | SU.Exact: Subject heading<br>Limits: Peer reviewed                                                                                                                                                                                                                                                                                                                                                                                                                                                           |     |

|         |                                      |                                                                                                                                                                                                                                                                                                                                                                                                                                                          |     |
|---------|--------------------------------------|----------------------------------------------------------------------------------------------------------------------------------------------------------------------------------------------------------------------------------------------------------------------------------------------------------------------------------------------------------------------------------------------------------------------------------------------------------|-----|
| 5/17/13 | LLBA                                 | ("vocal cord" OR "vocal fold") and (motion OR movement OR malfunction OR dysfunction OR obstruction OR syndrome OR paradoxical OR irritable OR spasm* OR asthma OR stridor OR croup OR dystonia OR adduct* OR wheez* OR tense OR tension) AND (treatment OR therapy OR exercise OR biofeedback OR technique OR rehabilitation OR awareness OR control OR train* OR support OR relax OR cough OR sniff)                                                   | 164 |
|         |                                      | Same limits                                                                                                                                                                                                                                                                                                                                                                                                                                              |     |
| 5/17/13 | LLBA                                 | ("laryngeal dyskinesia" OR "laryngeal dyskinesia" OR (Munchausen AND stridor) OR "irritable larynx" OR "functional airway obstruction" OR "paroxysmal laryngospasm" OR "inspiratory adduction" OR "laryngeal dysfunction" OR "laryngeal wheezing" OR "functional upper airway obstruction") AND (treatment OR therapy OR exercise OR biofeedback OR technique OR rehabilitation OR awareness OR control OR train* OR support OR relax OR cough OR sniff) | 13  |
|         |                                      | Same limits                                                                                                                                                                                                                                                                                                                                                                                                                                              |     |
| 5/17/13 | LLBA                                 | (cough OR "chronic cough" OR pseudoasthma OR ((false OR fictitious OR mimic* OR hysteric* OR fake) AND asthma)) AND (treatment OR therapy OR exercise OR biofeedback OR technique OR rehabilitation OR awareness OR control OR train* OR support OR relax OR cough OR sniff)                                                                                                                                                                             | 52  |
|         |                                      | Same limits                                                                                                                                                                                                                                                                                                                                                                                                                                              |     |
| 5/20/13 | ERIC (ProQuest)                      | ("vocal cord" OR "vocal fold") and (motion OR movement OR malfunction OR dysfunction OR obstruction OR syndrome OR paradoxical OR irritable OR spasm* OR asthma OR stridor OR croup OR dystonia OR adduct* OR wheez* OR tense OR tension)                                                                                                                                                                                                                | 13  |
|         |                                      | Limits: Peer reviewed                                                                                                                                                                                                                                                                                                                                                                                                                                    |     |
| 5/20/13 | ERIC                                 | ("laryngeal dyskinesia" OR "laryngeal dyskinesia" OR (Munchausen AND stridor) OR "irritable larynx" OR "functional airway obstruction" OR "paroxysmal laryngospasm" OR "inspiratory adduction" OR "laryngeal dysfunction" OR "laryngeal wheezing" OR "functional upper airway obstruction")                                                                                                                                                              | 0   |
|         |                                      | Same limits                                                                                                                                                                                                                                                                                                                                                                                                                                              |     |
| 5/20/13 | ERIC                                 | (cough OR "chronic cough" OR pseudoasthma OR ((false OR fictitious OR mimic* OR hysteric* OR fake) AND asthma)) AND (treatment OR therapy OR exercise OR biofeedback OR technique OR rehabilitation OR awareness OR control OR train* OR support OR relax OR cough OR sniff)                                                                                                                                                                             | 42  |
|         |                                      | Same limits                                                                                                                                                                                                                                                                                                                                                                                                                                              |     |
| 5/20/13 | Social Services Abstracts (ProQuest) | ("vocal cord" OR "vocal fold") and (motion OR movement OR malfunction OR dysfunction OR obstruction OR syndrome OR paradoxical OR irritable OR spasm* OR asthma OR stridor OR croup OR dystonia OR adduct* OR wheez* OR tense OR tension)                                                                                                                                                                                                                | 1   |
|         |                                      | Limits: Peer reviewed                                                                                                                                                                                                                                                                                                                                                                                                                                    |     |
| 5/20/13 | Social Services Abstracts            | ("laryngeal dyskinesia" OR "laryngeal dyskinesia" OR (Munchausen AND stridor) OR "irritable larynx" OR "functional airway obstruction" OR "paroxysmal laryngospasm" OR "inspiratory adduction" OR "laryngeal dysfunction" OR "laryngeal wheezing" OR "functional upper airway obstruction")                                                                                                                                                              | 0   |

|                                          |                                       |                                                                                                                                                                                                                                                                                                                                                                                                                                                                                                                                                                                                                                                                                                                                                                                                                                                                                        |       |
|------------------------------------------|---------------------------------------|----------------------------------------------------------------------------------------------------------------------------------------------------------------------------------------------------------------------------------------------------------------------------------------------------------------------------------------------------------------------------------------------------------------------------------------------------------------------------------------------------------------------------------------------------------------------------------------------------------------------------------------------------------------------------------------------------------------------------------------------------------------------------------------------------------------------------------------------------------------------------------------|-------|
| 5/20/13                                  | Social Services Abstracts             | Same limits<br>(cough OR "chronic cough" OR pseudoasthma OR ((false OR fictitious OR mimic* OR hysteric* OR fake) AND asthma)) AND (treatment OR therapy OR exercise OR biofeedback OR technique OR rehabilitation OR awareness OR control OR train* OR support OR relax OR cough OR sniff)                                                                                                                                                                                                                                                                                                                                                                                                                                                                                                                                                                                            | 46    |
| 5/20/13,<br>5/21/13,<br>5/22/13, 5/23/13 | Web of Knowledge<br>(Thomson Reuters) | Same limits<br>Topic=("vocal cord" OR "vocal fold") AND Topic=(motion OR movement OR malfunction OR dysfunction OR obstruction OR syndrome OR paradoxical OR irritable OR spasm* OR asthma OR stridor OR croup OR dystonia OR adduct* OR wheez* OR tense OR tension) AND Topic=(treatment OR therapy OR exercise OR biofeedback OR technique OR rehabilitation OR awareness OR control OR train* OR support OR relax OR cough OR sniff)<br><br>Limits: Languages=( ENGLISH ) AND Research Domains=( SCIENCE TECHNOLOGY OR SOCIAL SCIENCES ) AND Research Areas=( OTORHINOLARYNGOLOGY OR PSYCHIATRY OR PEDIATRICS OR LIFE SCIENCES BIOMEDICINE OTHER TOPICS OR AUDIOLOGY SPEECH LANGUAGE PATHOLOGY OR EMERGENCY MEDICINE OR PHYSIOLOGY OR HEALTH CARE SCIENCES SERVICES OR ALLERGY OR BEHAVIORAL SCIENCES )                                                                             | 1,457 |
| 5/20/13,<br>5/21/13,<br>5/22/13, 5/23/13 | Web of Knowledge                      | Topic=((("laryngeal dyskinesia" OR "laryngeal dyskinesia" OR (Munchausen AND stridor) OR "irritable larynx" OR "functional airway obstruction" OR "paroxysmal laryngospasm" OR "inspiratory adduction" OR "laryngeal dysfunction" OR "laryngeal wheezing" OR "functional upper airway obstruction")) AND Topic=(treatment OR therapy OR exercise OR biofeedback OR technique OR rehabilitation OR awareness OR control OR train* OR support OR relax OR cough OR sniff)<br>Limits: Languages=( ENGLISH )                                                                                                                                                                                                                                                                                                                                                                               | 193   |
| 5/20/13,<br>5/21/13,<br>5/22/13, 5/23/13 | Web of Knowledge                      | Topic=((cough OR "chronic cough" OR pseudoasthma OR ((false OR fictitious OR mimic* OR hysteric* OR fake) AND asthma))) AND Topic=((behavior OR behavioral OR exercise OR biofeedback OR technique OR rehabilitation OR awareness OR control OR train* OR (breath AND support) OR relax OR sniff) AND Topic=((treatment OR therapy OR exercise OR biofeedback OR technique OR rehabilitation OR awareness OR control OR train* OR support OR relax OR cough OR sniff))<br>Refined by: Research Domains=( SCIENCE TECHNOLOGY OR SOCIAL SCIENCES ) AND Research Areas=( HEALTH CARE SCIENCES SERVICES OR GENERAL INTERNAL MEDICINE OR PSYCHOLOGY OR BEHAVIORAL SCIENCES OR PHYSIOLOGY OR ALLERGY OR OTORHINOLARYNGOLOGY ) AND Document Types=( ARTICLE OR ABSTRACT OR CASE REPORT OR REVIEW OR CLINICAL TRIAL ) AND Languages=( ENGLISH )<br>Timespan=All years.<br>Search language=Auto | 5,736 |
| 7/3/13, 7/5/13                           | ScienceDirect                         | TITLE-ABSTR-KEY("vocal cord" OR "vocal fold") and TITLE-ABSTR-KEY(motion OR movement OR malfunction OR dysfunction OR obstruction OR syndrome OR paradoxical OR irritable OR spasm* OR asthma OR stridor OR croup OR dystonia OR adduct* OR wheez* OR tense OR tension)[Journals(Medicine and Dentistry,Nursing and Health Professions,Psychology,Social Sciences)]                                                                                                                                                                                                                                                                                                                                                                                                                                                                                                                    | 583   |
| 7/3/13, 7/5/13                           | ScienceDirect                         | TITLE-ABSTR-KEY("laryngeal dyskinesia" OR "laryngeal dyskinesia" OR (Munchausen AND stridor) OR "irritable larynx" OR "functional airway obstruction" OR "paroxysmal laryngospasm" OR "inspiratory adduction" OR "laryngeal dysfunction" OR "laryngeal wheezing") and TITLE-ABSTR-KEY(treatment OR therapy OR exercise OR biofeedback OR technique OR rehabilitation OR awareness                                                                                                                                                                                                                                                                                                                                                                                                                                                                                                      | 23    |

|                |                                        |                                                                                                                                                                                                                                                                                                                                                                                               |     |
|----------------|----------------------------------------|-----------------------------------------------------------------------------------------------------------------------------------------------------------------------------------------------------------------------------------------------------------------------------------------------------------------------------------------------------------------------------------------------|-----|
|                |                                        | OR control OR train* OR support OR relax OR cough OR sniff)[Journals(Medicine and Dentistry,Nursing and Health Professions,Psychology,Social Sciences)]                                                                                                                                                                                                                                       |     |
| 7/3/13, 7/5/13 | ScienceDirect                          | TITLE-ABSTR-KEY("functional upper airway obstruction") and TITLE-ABSTR-KEY(treatment OR therapy OR exercise OR biofeedback OR technique OR rehabilitation OR awareness OR control OR train* OR support OR relax OR cough OR sniff)[Journals(Medicine and Dentistry,Nursing and Health Professions,Psychology,Social Sciences)]                                                                | 2   |
| 7/3/13, 7/5/13 | ScienceDirect                          | TITLE-ABSTR-KEY("chronic cough" OR pseudoasthma OR ((false OR fictitious OR mimic* OR hysteric* OR fake) AND asthma)) and TITLE-ABSTR-KEY(treatment OR therapy OR exercise OR biofeedback OR technique OR rehabilitation OR awareness OR control OR train* OR support OR relax OR cough OR sniff)[Journals(Medicine and Dentistry,Nursing and Health Professions,Psychology,Social Sciences)] | 384 |
| 7/5/13         | Campbell Library                       | All text =(vocal fold)                                                                                                                                                                                                                                                                                                                                                                        | 6   |
| 7/5/13         | Campbell Library                       | All text =(vocal cold)                                                                                                                                                                                                                                                                                                                                                                        | 9   |
| 7/5/13         | Campbell Library                       | All text =(laryngeal dyskinesia)                                                                                                                                                                                                                                                                                                                                                              | 0   |
| 7/5/13         | Campbell Library                       | All text =(laryngeal dyskinesia)                                                                                                                                                                                                                                                                                                                                                              | 0   |
| 7/5/13         | Campbell Library                       | All text =(munchausen's stridor)                                                                                                                                                                                                                                                                                                                                                              | 0   |
| 7/5/13         | Campbell Library                       | All text =(stridor)                                                                                                                                                                                                                                                                                                                                                                           | 0   |
| 7/5/13         | Campbell Library                       | All text =(irritable larynx)                                                                                                                                                                                                                                                                                                                                                                  | 1   |
| 7/5/13         | Campbell Library                       | All text =(functional airway obstruction)                                                                                                                                                                                                                                                                                                                                                     | 49  |
| 7/5/13         | Campbell Library                       | All text =(paroxysmal laryngospasm)                                                                                                                                                                                                                                                                                                                                                           | 0   |
| 7/5/13         | Campbell Library                       | All text =(inspiratory adduction)                                                                                                                                                                                                                                                                                                                                                             | 0   |
| 7/5/13         | Campbell Library                       | All text =(laryngeal dysfunction)                                                                                                                                                                                                                                                                                                                                                             | 22  |
| 7/5/13         | Campbell Library                       | All text =(laryngeal wheezing)                                                                                                                                                                                                                                                                                                                                                                | 1   |
| 7/5/13         | Campbell Library                       | All text =(functional upper airway obstruction)                                                                                                                                                                                                                                                                                                                                               | 91  |
| 7/5/13         | Cochrane Collaboration Library (Wiley) | "Vocal Cords"[Mesh]                                                                                                                                                                                                                                                                                                                                                                           | 89  |
|                |                                        | Yield:<br>Cochrane Reviews 2<br>Other Reviews 2<br>Trials 82<br>Methods Studies 0<br>Technology Assessments 2<br>Economic Evaluations 1<br>Cochrane Groups 0                                                                                                                                                                                                                                  |     |
| 7/5/13         | Cochrane Library                       | "Laryngeal Diseases"[Mesh]                                                                                                                                                                                                                                                                                                                                                                    | 718 |
|                |                                        | Yield:<br>Cochrane Reviews 16<br>Other Reviews 45<br>Trials 633<br>Methods Studies 0<br>Technology Assessments 9                                                                                                                                                                                                                                                                              |     |

|        |                        |                                                                                                                                                                                                                                                                                                                                                                                                                                                          |     |
|--------|------------------------|----------------------------------------------------------------------------------------------------------------------------------------------------------------------------------------------------------------------------------------------------------------------------------------------------------------------------------------------------------------------------------------------------------------------------------------------------------|-----|
|        |                        | Economic Evaluations 15<br>Cochrane Groups 0                                                                                                                                                                                                                                                                                                                                                                                                             |     |
| 7/5/13 | Cochrane Library       | ("vocal cord" OR "vocal fold") and (motion OR movement OR malfunction OR dysfunction obstruction OR syndrome OR paradoxical OR irritable OR spasm* OR asthma OR stridor OR croup OR dystonia OR adduct* OR wheez* OR tense OR tension) AND (treatment OR therapy OR exercise OR biofeedback OR technique OR rehabilitation OR awareness OR control OR train* OR support OR relax OR cough OR sniff)                                                      | 99  |
|        |                        | Yield:<br>Cochrane Reviews 30<br>Other Reviews 2<br>Trials 65<br>Methods Studies 0<br>Technology Assessments 0<br>Economic Evaluations 1<br>Cochrane Groups 1                                                                                                                                                                                                                                                                                            |     |
| 7/5/13 | Cochrane Library       | ("laryngeal dyskinesia" OR "laryngeal dyskinesia" OR (Munchausen AND stridor) OR "irritable larynx" OR "functional airway obstruction" OR "paroxysmal laryngospasm" OR "inspiratory adduction" OR "laryngeal dysfunction" OR "laryngeal wheezing" OR "functional upper airway obstruction") AND (treatment OR therapy OR exercise OR biofeedback OR technique OR rehabilitation OR awareness OR control OR train* OR support OR relax OR cough OR sniff) | 6   |
|        |                        | Yield:<br>Cochrane Reviews 2<br>Other Reviews 0<br>Trials 4<br>Methods Studies 0<br>Technology Assessments 0<br>Economic Evaluations 0<br>Cochrane Groups 0                                                                                                                                                                                                                                                                                              |     |
| 7/5/13 | Cochrane Library       | ("chronic cough" OR pseudoasthma OR ((false OR fictitious OR mimic* OR hysteric* OR fake) AND asthma)) AND (treatment OR therapy OR exercise OR biofeedback OR technique OR rehabilitation OR awareness OR control OR train* OR support OR relax OR cough OR sniff)                                                                                                                                                                                      | 349 |
|        |                        | Yield:<br>Cochrane Reviews 145<br>Other Reviews 7<br>Trials 182<br>Methods Studies 2<br>Technology Assessments 2<br>Economic Evaluations 8<br>Cochrane Groups 3                                                                                                                                                                                                                                                                                          |     |
| 7/5/13 | Centre for Reviews and | "Vocal Cords"[Mesh]                                                                                                                                                                                                                                                                                                                                                                                                                                      | 5   |

| Dissemination Database (CRD) |                                                                  |                                                                                                                                                                                                                                                                                                                                                                                                                                                                                  |    |
|------------------------------|------------------------------------------------------------------|----------------------------------------------------------------------------------------------------------------------------------------------------------------------------------------------------------------------------------------------------------------------------------------------------------------------------------------------------------------------------------------------------------------------------------------------------------------------------------|----|
| 7/5/13                       | CRD Database                                                     | "Laryngeal Diseases"[Mesh]                                                                                                                                                                                                                                                                                                                                                                                                                                                       | 76 |
| 7/5/13                       | CRD Database                                                     | Any Field =("vocal cord" OR "vocal fold") AND Any Field = (motion OR movement OR malfunction OR dysfunction OR obstruction OR syndrome OR paradoxical OR irritable OR spasm* OR asthma OR stridor OR croup OR dystonia OR adduct* OR wheez* OR tense OR tension) AND Any Field = (treatment OR therapy OR exercise OR biofeedback OR technique OR rehabilitation OR awareness OR control OR train* OR support OR relax OR cough OR sniff)                                        | 5  |
| 7/5/13                       | CRD Database                                                     | Any Field = ("laryngeal dyskinesia" OR "laryngeal dyskinesia" OR (Munchausen AND stridor) OR "irritable larynx" OR "functional airway obstruction" OR "paroxysmal laryngospasm" OR "inspiratory adduction" OR "laryngeal dysfunction" OR "laryngeal wheezing" OR "functional upper airway obstruction") AND Any Field = (treatment OR therapy OR exercise OR biofeedback OR technique OR rehabilitation OR awareness OR control OR train* OR support OR relax OR cough OR sniff) | 0  |
| 7/5/13                       | CRD Database                                                     | All Field =("chronic cough" OR pseudoasthma OR ((false OR fictitious OR mimic* OR hysteric* OR fake) AND asthma)) AND Any Field =(treatment OR therapy OR exercise OR biofeedback OR technique OR rehabilitation OR awareness OR control OR train* OR support OR relax OR cough OR sniff)                                                                                                                                                                                        | 68 |
| 7/5/13                       | Latin American and Caribbean Health Sciences Literature (LILACS) | Words = ("vocal cord" OR "vocal fold") AND Words = (motion OR movement OR malfunction OR dysfunction OR obstruction OR syndrome OR paradoxical OR irritable OR spasm OR asthma OR stridor OR croup OR dystonia OR adduction OR adduct OR wheeze OR wheezing OR tense OR tension)                                                                                                                                                                                                 | 46 |
| 7/5/13                       | LILACS                                                           | Words = ("laryngeal dyskinesia" OR "laryngeal dyskinesia" OR (Munchausen AND stridor) OR "irritable larynx" OR "functional airway obstruction" OR "paroxysmal laryngospasm" OR "inspiratory adduction" OR "laryngeal dysfunction" OR "laryngeal wheezing" OR "functional upper airway obstruction")                                                                                                                                                                              | 0  |
| 7/5/13                       | LILACS                                                           | Words = ("chronic cough" OR pseudoasthma OR ((false OR fictitious OR mimic* OR hysteric* OR fake) AND asthma))                                                                                                                                                                                                                                                                                                                                                                   | 0  |
| 7/5/13                       | REHABDATA                                                        | "vocal cord"                                                                                                                                                                                                                                                                                                                                                                                                                                                                     | 15 |
| 7/5/13                       | REHABDATA                                                        | "vocal fold"                                                                                                                                                                                                                                                                                                                                                                                                                                                                     | 21 |
| 7/5/13                       | REHABDATA                                                        | "laryngeal dyskinesia"                                                                                                                                                                                                                                                                                                                                                                                                                                                           | 0  |
| 7/5/13                       | REHABDATA                                                        | "laryngeal dyskinesia"                                                                                                                                                                                                                                                                                                                                                                                                                                                           | 0  |
| 7/5/13                       | REHABDATA                                                        | "Munchausen's stridor"                                                                                                                                                                                                                                                                                                                                                                                                                                                           | 0  |
| 7/5/13                       | REHABDATA                                                        | "irritable larynx"                                                                                                                                                                                                                                                                                                                                                                                                                                                               | 0  |
| 7/5/13                       | REHABDATA                                                        | "functional airway obstruction"                                                                                                                                                                                                                                                                                                                                                                                                                                                  | 0  |
| 7/5/13                       | REHABDATA                                                        | "paroxysmal laryngospasm"                                                                                                                                                                                                                                                                                                                                                                                                                                                        | 0  |
| 7/5/13                       | REHABDATA                                                        | "inspiratory adduction"                                                                                                                                                                                                                                                                                                                                                                                                                                                          | 0  |
| 7/5/13                       | REHABDATA                                                        | "laryngeal dysfunction"                                                                                                                                                                                                                                                                                                                                                                                                                                                          | 0  |
| 7/5/13                       | REHABDATA                                                        | "laryngeal wheezing"                                                                                                                                                                                                                                                                                                                                                                                                                                                             | 0  |
| 7/5/13                       | REHABDATA                                                        | "functional upper airway obstruction"                                                                                                                                                                                                                                                                                                                                                                                                                                            | 0  |
| 7/5/13                       | REHABDATA                                                        | "chronic cough"                                                                                                                                                                                                                                                                                                                                                                                                                                                                  | 3  |
| 7/5/13                       | REHABDATA                                                        | pseudoasthma                                                                                                                                                                                                                                                                                                                                                                                                                                                                     | 0  |

|        |               |                                                                                                                                                                                                                                                                                                                                                                                        |     |
|--------|---------------|----------------------------------------------------------------------------------------------------------------------------------------------------------------------------------------------------------------------------------------------------------------------------------------------------------------------------------------------------------------------------------------|-----|
| 7/5/13 | REHABDATA     | (false OR fictitious OR mimic OR hysteric OR hysterical OR fake) AND asthma                                                                                                                                                                                                                                                                                                            | 0   |
| 7/5/13 | speechBITE    | Target Area = Voice (All) AND Intervention = Voice Therapy                                                                                                                                                                                                                                                                                                                             | 348 |
| 7/5/13 | Trip Database | ("vocal cord") and (motion OR movement OR malfunction OR dysfunction OR obstruction OR syndrome OR paradoxical OR irritable OR spasm* OR asthma OR stridor OR croup OR dystonia OR adduct* OR wheez* OR tense OR tension) AND (treatment OR therapy OR exercise OR biofeedback OR technique OR rehabilitation OR awareness OR control OR train* OR support OR relax OR cough OR sniff) | 750 |
|        |               | All Secondary Evidence                                                                                                                                                                                                                                                                                                                                                                 |     |
|        |               | -Evidence-based Synopses 11                                                                                                                                                                                                                                                                                                                                                            |     |
|        |               | -Systematic Review 17                                                                                                                                                                                                                                                                                                                                                                  |     |
|        |               | -Guidelines                                                                                                                                                                                                                                                                                                                                                                            |     |
|        |               | --Aus & NZ 2                                                                                                                                                                                                                                                                                                                                                                           |     |
|        |               | --Canada 2                                                                                                                                                                                                                                                                                                                                                                             |     |
|        |               | --UK 24                                                                                                                                                                                                                                                                                                                                                                                |     |
|        |               | --USA 34                                                                                                                                                                                                                                                                                                                                                                               |     |
|        |               | --Other 1                                                                                                                                                                                                                                                                                                                                                                              |     |
|        |               | Clinical Q&A 0                                                                                                                                                                                                                                                                                                                                                                         |     |
|        |               | Key Primary Research 1                                                                                                                                                                                                                                                                                                                                                                 |     |
|        |               | Controlled Trials 80                                                                                                                                                                                                                                                                                                                                                                   |     |
|        |               | Extended Primary Research 245                                                                                                                                                                                                                                                                                                                                                          |     |
|        |               | Case reports 16                                                                                                                                                                                                                                                                                                                                                                        |     |
|        |               | eTextbooks 317                                                                                                                                                                                                                                                                                                                                                                         |     |
| 7/5/13 | Trip Database | ("vocal fold") and (motion OR movement OR malfunction OR dysfunction OR obstruction OR syndrome OR paradoxical OR irritable OR spasm* OR asthma OR stridor OR croup OR dystonia OR adduct* OR wheez* OR tense OR tension) AND (treatment OR therapy OR exercise OR biofeedback OR technique OR rehabilitation OR awareness OR control OR train* OR support OR relax OR cough OR sniff) | 328 |
|        |               | All Secondary Evidence                                                                                                                                                                                                                                                                                                                                                                 |     |
|        |               | -Evidence-based Synopses 3                                                                                                                                                                                                                                                                                                                                                             |     |
|        |               | -Systematic Review 1                                                                                                                                                                                                                                                                                                                                                                   |     |
|        |               | -Guidelines                                                                                                                                                                                                                                                                                                                                                                            |     |
|        |               | --Aus & NZ 0                                                                                                                                                                                                                                                                                                                                                                           |     |
|        |               | --Canada 0                                                                                                                                                                                                                                                                                                                                                                             |     |
|        |               | --UK 2                                                                                                                                                                                                                                                                                                                                                                                 |     |
|        |               | --USA 0                                                                                                                                                                                                                                                                                                                                                                                |     |
|        |               | --Other 0                                                                                                                                                                                                                                                                                                                                                                              |     |
|        |               | Clinical Q&A 0                                                                                                                                                                                                                                                                                                                                                                         |     |
|        |               | Key Primary Research 0                                                                                                                                                                                                                                                                                                                                                                 |     |
|        |               | Controlled Trials 15                                                                                                                                                                                                                                                                                                                                                                   |     |
|        |               | Extended Primary Research 240                                                                                                                                                                                                                                                                                                                                                          |     |
|        |               | Case reports 2                                                                                                                                                                                                                                                                                                                                                                         |     |

|                         |               |                                                                                                                                                                                                                                                                                                                                                                                                                                                                                                                                                                                                                                                                                                                                                                                     |                           |
|-------------------------|---------------|-------------------------------------------------------------------------------------------------------------------------------------------------------------------------------------------------------------------------------------------------------------------------------------------------------------------------------------------------------------------------------------------------------------------------------------------------------------------------------------------------------------------------------------------------------------------------------------------------------------------------------------------------------------------------------------------------------------------------------------------------------------------------------------|---------------------------|
| 7/5/13                  | Trip Database | eTextbooks 65<br>("laryngeal dyskinesia" OR "laryngeal dyskinesia" OR (Munchausen AND stridor) OR "irritable larynx" OR "functional airway obstruction" OR "paroxysmal laryngospasm" OR "inspiratory adduction" OR "laryngeal dysfunction" OR "laryngeal wheezing" OR "functional upper airway obstruction") AND (treatment OR therapy OR exercise OR biofeedback OR technique OR rehabilitation OR awareness OR control OR train* OR support OR relax OR cough OR sniff)<br><br>All Secondary Evidence<br>-Evidence-based Synopses 1<br>-Systematic Review 0<br>-Guidelines<br>--Aus & NZ 0<br>--Canada 0<br>--UK 0<br>--USA 2<br>--Other 0<br>Clinical Q&A 0<br>Key Primary Research 0<br>Controlled Trials 10<br>Extended Primary Research 17<br>Case reports 3<br>eTextbooks 15 | 45                        |
| 7/5/13                  | Trip Database | ("chronic cough" OR pseudoasthma OR ((false OR fictitious OR mimic* OR hysteric* OR fake) AND asthma)) AND (treatment OR therapy OR exercise OR biofeedback OR technique OR rehabilitation OR awareness OR control OR train* OR support OR relax OR cough OR sniff)<br><br>All Secondary Evidence<br>-Evidence-based Synopses 58<br>-Systematic Review 65<br>-Guidelines<br>--Aus & NZ 37<br>--Canada 33<br>--UK 120<br>--USA 155<br>--Other 28<br>Clinical Q&A 6<br>Key Primary Research 22<br>Controlled Trials 135<br>Extended Primary Research 446 #381, p.8<br>Case reports 27<br>eTextbooks 496                                                                                                                                                                               | 1,628                     |
| 7/8/13, 7/9/13, 7/10/13 | GoogleScholar | ("vocal cord" OR "vocal fold") AND (motion OR movement OR malfunction OR dysfunction OR obstruction OR syndrome OR paradoxical OR irritable OR spasm* OR asthma OR stridor OR croup OR                                                                                                                                                                                                                                                                                                                                                                                                                                                                                                                                                                                              | ~15,600<br>Unable to view |



|                 |               |                                                                                                                                                                                                                                                                                                                                                                                                                                                          |                                               |
|-----------------|---------------|----------------------------------------------------------------------------------------------------------------------------------------------------------------------------------------------------------------------------------------------------------------------------------------------------------------------------------------------------------------------------------------------------------------------------------------------------------|-----------------------------------------------|
|                 |               | dystonia OR adduct* OR wheez* OR tense OR tension) AND (treatment OR therapy OR exercise OR biofeedback OR technique OR rehabilitation OR awareness OR control OR train* OR support OR relax OR cough OR sniff)                                                                                                                                                                                                                                          | results beyond 1,000                          |
| 7/9/13          | GoogleScholar | ("laryngeal dyskinesia" OR "laryngeal dyskinesia" OR (Munchausen AND stridor) OR "irritable larynx" OR "functional airway obstruction" OR "paroxysmal laryngospasm" OR "inspiratory adduction" OR "laryngeal dysfunction" OR "laryngeal wheezing" OR "functional upper airway obstruction") AND (treatment OR therapy OR exercise OR biofeedback OR technique OR rehabilitation OR awareness OR control OR train* OR support OR relax OR cough OR sniff) | 469                                           |
| 7/9/13, 7/10/13 | GoogleScholar | ("chronic cough" OR pseudoasthma OR ((false OR fictitious OR mimic* OR hysteric* OR fake) AND asthma)) AND ("vocal cord" OR "vocal fold") AND (treatment OR therapy OR exercise OR biofeedback OR technique OR rehabilitation OR awareness OR control OR train* OR support OR relax OR cough OR sniff)                                                                                                                                                   | ~3,860<br>Unable to view results beyond 1,000 |
