# Supplementary material
Source: publisher figshare collection journal article supplement (https://asha.figshare.com/articles/dataset/_/6170243)
Supplement: Supplementary file 2 [file 1]

## ONLINE SUPPLEMENTAL MATERIALS – TABLE S4

**Table S4**

*Expanded Keyword Search String*

| Date                                                                                                     | Database       | Search String                                                                                                                                                                                                                                                                                                                                                                                                                                                                         | Yield |
|----------------------------------------------------------------------------------------------------------|----------------|---------------------------------------------------------------------------------------------------------------------------------------------------------------------------------------------------------------------------------------------------------------------------------------------------------------------------------------------------------------------------------------------------------------------------------------------------------------------------------------|-------|
| 3/19/13,<br>3/20/13,<br>3/22/13,<br>3/26/13,<br>3/27/13, 4/3/13,<br>4/4/13, 4/12/13,<br>4/18/13, 4/19/13 | PubMed         | ("Vocal Cords"[Mesh] OR "Laryngeal Diseases"[Mesh]) AND ("Psychotherapy"[Mesh] OR "Treatment Outcome"[Mesh] OR "Gastroesophageal Reflux"[Mesh] OR "Breathing Exercises"[Mesh] OR "Asthma"[Mesh] OR "Respiration Disorders"[Mesh] OR "Rehabilitation of Speech and Language Disorders"[Mesh]) AND (motion OR malfunction OR dysfunction OR syndrome OR paradoxical OR irritable OR spasm* OR asthma OR stridor OR croup OR dystonia OR adduct* OR cough OR wheez* OR tense OR tension) | 3004  |
|                                                                                                          |                | Mesh: Medical Subject Heading<br>Filters activated: Humans, English                                                                                                                                                                                                                                                                                                                                                                                                                   |       |
| 4/19/13                                                                                                  | PubMed         | ("laryngeal dyskinesia" OR "laryngeal dyskinesia" OR (Munchausen AND stridor) OR "irritable larynx" OR "functional airway obstruction" OR "paroxysmal laryngospasm" OR "inspiratory adduction" OR "laryngeal dysfunction" OR "laryngeal wheezing" OR "functional upper airway obstruction") AND (treatment OR therapy OR exercise OR biofeedback OR technique OR rehabilitation OR awareness OR control OR train* OR support OR relax OR cough OR sniff)                              | 119   |
|                                                                                                          |                | Same limits                                                                                                                                                                                                                                                                                                                                                                                                                                                                           |       |
| 4/19/13,<br>4/22/13, 4/23/13                                                                             | PubMed         | ((("vocal cord" OR "vocal fold") AND (movement OR dysfunction OR motion OR malfunction OR obstruction)) AND (treatment OR therapy OR exercise OR biofeedback OR technique OR rehabilitation OR awareness OR control OR train* OR support OR relax OR cough OR sniff))                                                                                                                                                                                                                 | 1918  |
|                                                                                                          |                | Same limits                                                                                                                                                                                                                                                                                                                                                                                                                                                                           |       |
| 4/25/13                                                                                                  | PubMed         | "Cough"[Mesh] AND ("vocal cord " OR "vocal fold")                                                                                                                                                                                                                                                                                                                                                                                                                                     | 72    |
|                                                                                                          |                | Same limits                                                                                                                                                                                                                                                                                                                                                                                                                                                                           |       |
| 4/25/13, 4/26/13                                                                                         | PubMed         | ("chronic cough" OR pseudoasthma OR ((false OR fictitious OR mimic* OR hysteric* OR fake) AND asthma) )AND (behavior OR behavioral OR exercise OR biofeedback OR technique OR rehabilitation OR awareness OR control OR train* OR (breath AND support) OR relax OR sniff)                                                                                                                                                                                                             | 885   |
|                                                                                                          |                | Same limits                                                                                                                                                                                                                                                                                                                                                                                                                                                                           |       |
| 5/8/13, 5/9/13                                                                                           | CINAHL (EBSCO) | ((MH "Vocal Cords") OR (MH "Laryngeal Diseases+") OR (MH "Cough")) AND (motion OR movement OR malfunction OR dysfunction OR obstruction OR syndrome OR paradoxical OR irritable OR spasm* OR asthma OR stridor OR croup OR dystonia OR adduct* OR wheez* OR tense OR tension) AND (treatment OR therapy OR exercise OR biofeedback OR technique OR rehabilitation OR                                                                                                                  | 672   |

|                  |                                |                                                                                                                                                                                                                                                                                                                                                                                                                                                                                                                                                                                                                                                                                     |     |
|------------------|--------------------------------|-------------------------------------------------------------------------------------------------------------------------------------------------------------------------------------------------------------------------------------------------------------------------------------------------------------------------------------------------------------------------------------------------------------------------------------------------------------------------------------------------------------------------------------------------------------------------------------------------------------------------------------------------------------------------------------|-----|
|                  |                                | awareness OR control OR train* OR support OR relax OR cough OR sniff)                                                                                                                                                                                                                                                                                                                                                                                                                                                                                                                                                                                                               |     |
|                  |                                | MH: Major Heading<br>Limits: English Language, Peer Reviewed, Human                                                                                                                                                                                                                                                                                                                                                                                                                                                                                                                                                                                                                 |     |
| 5/9/13           | CINAHL                         | ("laryngeal dyskinesia" OR "laryngeal dyskinesia" OR (Munchausen AND stridor) OR "irritable larynx" OR "functional airway obstruction" OR "paroxysmal laryngospasm" OR "inspiratory adduction" OR "laryngeal dysfunction" OR "laryngeal wheezing" OR "functional upper airway obstruction") AND (treatment OR therapy OR exercise OR biofeedback OR technique OR rehabilitation OR awareness OR control OR train* OR support OR relax OR cough OR sniff)                                                                                                                                                                                                                            | 11  |
|                  |                                | Same limits                                                                                                                                                                                                                                                                                                                                                                                                                                                                                                                                                                                                                                                                         |     |
| 5/9/13, 5/10/13  | CINAHL                         | ("vocal cord" OR "vocal fold") and (motion OR movement OR malfunction OR dysfunction OR obstruction OR syndrome OR paradoxical OR irritable OR spasm* OR asthma OR stridor OR croup OR dystonia OR adduct* OR wheez* OR tense OR tension) AND (treatment OR therapy OR exercise OR biofeedback OR technique OR rehabilitation OR awareness OR control OR train* OR support OR relax OR cough OR sniff)                                                                                                                                                                                                                                                                              | 165 |
|                  |                                | Same limits                                                                                                                                                                                                                                                                                                                                                                                                                                                                                                                                                                                                                                                                         |     |
| 5/10/13          | CINAHL                         | ("chronic cough" OR pseudoasthma OR ((false OR fictitious OR mimic* OR hysteric* OR fake) AND asthma)) AND (behavior OR behavioral OR exercise OR biofeedback OR technique OR rehabilitation OR awareness OR control OR train* OR (breath AND support) OR relax OR sniff)                                                                                                                                                                                                                                                                                                                                                                                                           | 69  |
|                  |                                | Same limits                                                                                                                                                                                                                                                                                                                                                                                                                                                                                                                                                                                                                                                                         |     |
| 5/10/13, 5/13/13 | Health Source: Nursing (EBSCO) | (DE "LARYNX -- Diseases" OR DE "LARYNGEAL edema" OR DE "LARYNGISMUS stridulus" OR DE "LARYNGITIS" OR DE "LARYNX -- Radiography" OR DE "LARYNX -- Stenosis" OR DE "VOICE disorders" OR DE "VOCAL cords" OR DE "VOCAL sac" OR DE "COUGH") AND (motion OR movement OR malfunction OR dysfunction OR obstruction OR syndrome OR paradoxical OR irritable OR spasm* OR asthma OR stridor OR croup OR dystonia OR adduct* OR wheez* OR tense OR tension) AND (treatment OR therapy OR exercise OR biofeedback OR technique OR rehabilitation OR awareness OR control OR train* OR support OR relax OR cough OR sniff)<br>DE: Thesaurus term<br>Limits: Scholarly (Peer Reviewed) Journals | 370 |
| 5/13/13          | Health Source: Nursing         | ("laryngeal dyskinesia" OR "laryngeal dyskinesia" OR (Munchausen AND stridor) OR "irritable larynx" OR "functional airway obstruction" OR "paroxysmal laryngospasm" OR "inspiratory adduction" OR "laryngeal dysfunction" OR "laryngeal wheezing" OR "functional upper airway obstruction") AND (treatment OR therapy OR exercise OR biofeedback OR technique OR rehabilitation OR awareness OR control OR train* OR support OR relax OR cough OR sniff)                                                                                                                                                                                                                            | 6   |
|                  |                                | Same limits                                                                                                                                                                                                                                                                                                                                                                                                                                                                                                                                                                                                                                                                         |     |
| 5/13/13          | Health Source: Nursing         | ("vocal cord" OR "vocal fold") and (motion OR movement OR malfunction OR dysfunction OR obstruction OR syndrome OR paradoxical OR irritable OR spasm* OR asthma OR stridor OR croup OR dystonia OR adduct* OR wheez* OR tense OR tension) AND (treatment OR therapy OR exercise OR biofeedback OR technique OR rehabilitation OR awareness OR control OR train* OR support OR relax OR cough OR sniff)                                                                                                                                                                                                                                                                              | 150 |

|         |                                             |                                                                                                                                                                                                                                                                                                                                                                                                                                                                                                                                                                                                                                                                                                                    |     |
|---------|---------------------------------------------|--------------------------------------------------------------------------------------------------------------------------------------------------------------------------------------------------------------------------------------------------------------------------------------------------------------------------------------------------------------------------------------------------------------------------------------------------------------------------------------------------------------------------------------------------------------------------------------------------------------------------------------------------------------------------------------------------------------------|-----|
|         |                                             | OR cough OR sniff)                                                                                                                                                                                                                                                                                                                                                                                                                                                                                                                                                                                                                                                                                                 |     |
|         |                                             | Same limits                                                                                                                                                                                                                                                                                                                                                                                                                                                                                                                                                                                                                                                                                                        |     |
| 5/13/13 | Health Source: Nursing                      | ("chronic cough" OR pseudoasthma OR ((false OR fictitious OR mimic* OR hysteric* OR fake) AND asthma)) AND (behavior OR behavioral OR exercise OR biofeedback OR technique OR rehabilitation OR awareness OR control OR train* OR (breath AND support) OR relax OR sniff)                                                                                                                                                                                                                                                                                                                                                                                                                                          | 105 |
|         |                                             | Same limits                                                                                                                                                                                                                                                                                                                                                                                                                                                                                                                                                                                                                                                                                                        |     |
| 5/13/13 | Communication & Mass Media Complete (EBSCO) | (DE "VOCAL cords" OR DE "VOCAL sac" OR DE "LARYNX" OR DE "ARTIFICIAL larynges" OR DE "GLOTTIS" OR DE "VOICE" OR DE "AUTOMATIC speech recognition" OR DE "FORMANTS (Speech)" OR DE "NASALITY (Phonetics)" OR DE "NORMAL voice" OR DE "SONORANTS (Phonetics)" OR DE "VOCAL registers" OR DE "VOICE analysis" OR DE "VOICE misappropriation") AND (motion OR movement OR malfunction OR dysfunction OR obstruction OR syndrome OR paradoxical OR irritable OR spasm* OR asthma OR stridor OR croup OR dystonia OR adduct* OR wheez* OR tense OR tension) AND (treatment OR therapy OR exercise OR biofeedback OR technique OR rehabilitation OR awareness OR control OR train* OR support OR relax OR cough OR sniff) | 135 |
|         |                                             | DE: Thesaurus term<br>Limits: Scholarly (Peer Reviewed) Journals                                                                                                                                                                                                                                                                                                                                                                                                                                                                                                                                                                                                                                                   |     |
| 5/14/13 | Communication & Mass Media Complete         | ("laryngeal dyskinesia" OR "laryngeal dyskinesia" OR (Munchausen AND stridor) OR "irritable larynx" OR "functional airway obstruction" OR "paroxysmal laryngospasm" OR "inspiratory adduction" OR "laryngeal dysfunction" OR "laryngeal wheezing" OR "functional upper airway obstruction") AND (treatment OR therapy OR exercise OR biofeedback OR technique OR rehabilitation OR awareness OR control OR train* OR support OR relax OR cough OR sniff)                                                                                                                                                                                                                                                           | 2   |
|         |                                             | Same limits                                                                                                                                                                                                                                                                                                                                                                                                                                                                                                                                                                                                                                                                                                        |     |
| 5/14/13 | Communication & Mass Media Complete         | ("laryngeal dyskinesia" OR "laryngeal dyskinesia" OR (Munchausen AND stridor) OR "irritable larynx" OR "functional airway obstruction" OR "paroxysmal laryngospasm" OR "inspiratory adduction" OR "laryngeal dysfunction" OR "laryngeal wheezing" OR "functional upper airway obstruction")                                                                                                                                                                                                                                                                                                                                                                                                                        | 5   |
|         |                                             | Same limits                                                                                                                                                                                                                                                                                                                                                                                                                                                                                                                                                                                                                                                                                                        |     |
| 5/14/13 | Communication & Mass Media Complete         | ("vocal cord" OR "vocal fold") and (motion OR movement OR malfunction OR dysfunction OR obstruction OR syndrome OR paradoxical OR irritable OR spasm* OR asthma OR stridor OR croup OR dystonia OR adduct* OR wheez* OR tense OR tension) AND (treatment OR therapy OR exercise OR biofeedback OR technique OR rehabilitation OR awareness OR control OR train* OR support OR relax OR cough OR sniff)                                                                                                                                                                                                                                                                                                             | 68  |
|         |                                             | Same limits                                                                                                                                                                                                                                                                                                                                                                                                                                                                                                                                                                                                                                                                                                        |     |
| 5/14/13 | Communication & Mass Media Complete         | ("chronic cough" OR pseudoasthma OR ((false OR fictitious OR mimic* OR hysteric* OR fake) AND asthma)) AND (behavior OR behavioral OR exercise OR biofeedback OR technique OR rehabilitation OR awareness OR control OR train* OR (breath AND support) OR relax OR sniff)                                                                                                                                                                                                                                                                                                                                                                                                                                          | 3   |
|         |                                             | Same limits                                                                                                                                                                                                                                                                                                                                                                                                                                                                                                                                                                                                                                                                                                        |     |

|         |                                                       |                                                                                                                                                                                                                                                                                                                                                                                                                                                                                                                                             |     |
|---------|-------------------------------------------------------|---------------------------------------------------------------------------------------------------------------------------------------------------------------------------------------------------------------------------------------------------------------------------------------------------------------------------------------------------------------------------------------------------------------------------------------------------------------------------------------------------------------------------------------------|-----|
| 5/14/13 | Communication & Mass Media Complete                   | ("chronic cough" OR pseudoasthma OR ((false OR fictitious OR mimic* OR hysteric* OR fake) AND asthma))                                                                                                                                                                                                                                                                                                                                                                                                                                      | 7   |
|         |                                                       | Same limits                                                                                                                                                                                                                                                                                                                                                                                                                                                                                                                                 |     |
| 5/15/13 | Education Research Complete (EBSCO)                   | (DE "VOCAL cords" OR DE "VOICE Disorders") AND (motion OR movement OR malfunction OR dysfunction OR obstruction OR syndrome OR paradoxical OR irritable OR spasm* OR asthma OR stridor OR croup OR dystonia OR adduct* OR wheez* OR tense OR tension) AND (treatment OR therapy OR exercise OR biofeedback OR technique OR rehabilitation OR awareness OR control OR train* OR support OR relax OR cough OR sniff)                                                                                                                          | 147 |
|         |                                                       | DE: Subject term<br>Limits: Scholarly (Peer Reviewed) Journals                                                                                                                                                                                                                                                                                                                                                                                                                                                                              |     |
| 5/15/13 | Education Research Complete                           | ("vocal cord" OR "vocal fold") and (motion OR movement OR malfunction OR dysfunction OR obstruction OR syndrome OR paradoxical OR irritable OR spasm* OR asthma OR stridor OR croup OR dystonia OR adduct* OR wheez* OR tense OR tension) AND (treatment OR therapy OR exercise OR biofeedback OR technique OR rehabilitation OR awareness OR control OR train* OR support OR relax OR cough OR sniff)                                                                                                                                      | 40  |
|         |                                                       | Same limits                                                                                                                                                                                                                                                                                                                                                                                                                                                                                                                                 |     |
| 5/15/13 | Education Research Complete                           | ("laryngeal dyskinesia" OR "laryngeal dyskinesia" OR (Munchausen AND stridor) OR "irritable larynx" OR "functional airway obstruction" OR "paroxysmal laryngospasm" OR "inspiratory adduction" OR "laryngeal dysfunction" OR "laryngeal wheezing" OR "functional upper airway obstruction")                                                                                                                                                                                                                                                 | 3   |
|         |                                                       | Same limits                                                                                                                                                                                                                                                                                                                                                                                                                                                                                                                                 |     |
| 5/15/13 | Education Research Complete                           | ("chronic cough" OR pseudoasthma OR ((false OR fictitious OR mimic* OR hysteric* OR fake) AND asthma))                                                                                                                                                                                                                                                                                                                                                                                                                                      | 33  |
|         |                                                       | Same limits                                                                                                                                                                                                                                                                                                                                                                                                                                                                                                                                 |     |
| 5/15/13 | Psychology and Behavioral Sciences Collection (EBSCO) | (DE "VOICE disorders" OR DE "LARYNX -- Diseases" OR DE "LARYNGEAL edema" OR DE "LARYNGISMUS stridulus" OR DE "LARYNGITIS" OR DE "LARYNX -- Stenosis" OR DE "COUGH") AND (motion OR movement OR malfunction OR dysfunction OR obstruction OR syndrome OR paradoxical OR irritable OR spasm* OR asthma OR stridor OR croup OR dystonia OR adduct* OR wheez* OR tense OR tension) AND (treatment OR therapy OR exercise OR biofeedback OR technique OR rehabilitation OR awareness OR control OR train* OR support OR relax OR cough OR sniff) | 107 |
|         |                                                       | DE: Subject term<br>Limits: Peer Reviewed Journals                                                                                                                                                                                                                                                                                                                                                                                                                                                                                          |     |
| 5/15/13 | Psychology and Behavioral Sciences Collection         | ("vocal cord" OR "vocal fold") and (motion OR movement OR malfunction OR dysfunction OR obstruction OR syndrome OR paradoxical OR irritable OR spasm* OR asthma OR stridor OR croup OR dystonia OR adduct* OR wheez* OR tense OR tension) AND (treatment OR therapy OR exercise OR biofeedback OR technique OR rehabilitation OR awareness OR control OR train* OR support OR relax OR cough OR sniff)                                                                                                                                      | 87  |

|                  |                                               |                                                                                                                                                                                                                                                                                                                                                                                                                                                                       |     |
|------------------|-----------------------------------------------|-----------------------------------------------------------------------------------------------------------------------------------------------------------------------------------------------------------------------------------------------------------------------------------------------------------------------------------------------------------------------------------------------------------------------------------------------------------------------|-----|
| 5/15/13          | Psychology and Behavioral Sciences Collection | Same limits<br>("laryngeal dyskinesia" OR "laryngeal dyskinesia" OR (Munchausen AND stridor) OR "irritable larynx" OR "functional airway obstruction" OR "paroxysmal laryngospasm" OR "inspiratory adduction" OR "laryngeal dysfunction" OR "laryngeal wheezing" OR "functional upper airway obstruction")                                                                                                                                                            | 5   |
| 5/15/13          | Psychology and Behavioral Sciences Collection | Same limits<br>("chronic cough" OR pseudoasthma OR ((false OR fictitious OR mimic* OR hysteric* OR fake) AND asthma))                                                                                                                                                                                                                                                                                                                                                 | 92  |
| 5/15/13, 5/16/13 | PsycINFO (EBSCO)                              | Same limits<br>(DE "Laryngeal Disorders" OR DE "Dysphonia" OR DE "Voice" OR cough) AND (motion OR movement OR malfunction OR dysfunction OR obstruction OR syndrome OR paradoxical OR irritable OR spasm* OR asthma OR stridor OR croup OR dystonia OR adduct* OR wheez* OR tense OR tension) AND (treatment OR therapy OR exercise OR biofeedback OR technique OR rehabilitation OR awareness OR control OR train* OR support OR relax OR cough OR sniff)            | 349 |
| 5/16/13          | PsycINFO                                      | DE: Subject term<br>Limits: Peer Reviewed Journals; English<br>("vocal cord" OR "vocal fold") and (motion OR movement OR malfunction OR dysfunction OR obstruction OR syndrome OR paradoxical OR irritable OR spasm* OR asthma OR stridor OR croup OR dystonia OR adduct* OR wheez* OR tense OR tension) AND (treatment OR therapy OR exercise OR biofeedback OR technique OR rehabilitation OR awareness OR control OR train* OR support OR relax OR cough OR sniff) | 81  |
| 5/16/13          | PsycINFO                                      | Same limits<br>("laryngeal dyskinesia" OR "laryngeal dyskinesia" OR (Munchausen AND stridor) OR "irritable larynx" OR "functional airway obstruction" OR "paroxysmal laryngospasm" OR "inspiratory adduction" OR "laryngeal dysfunction" OR "laryngeal wheezing" OR "functional upper airway obstruction")                                                                                                                                                            | 8   |
| 5/16/13          | PsycINFO                                      | Same limits<br>("chronic cough" OR pseudoasthma OR ((false OR fictitious OR mimic* OR hysteric* OR fake) AND asthma))                                                                                                                                                                                                                                                                                                                                                 | 58  |
| 5/16/13          | PsycINFO                                      | Same limits<br>(DE "Speech Disorders") AND (motion OR movement OR malfunction OR dysfunction OR obstruction OR syndrome OR paradoxical OR irritable OR spasm* OR asthma OR stridor OR croup OR dystonia OR adduct* OR wheez* OR tense OR tension) AND (treatment OR therapy OR exercise OR biofeedback OR technique OR rehabilitation OR awareness OR control OR train* OR support OR relax OR cough OR sniff)                                                        | 195 |
| 5/16/13          | Teacher Reference Center                      | Same limits<br>("vocal cord" OR "vocal fold" OR voice OR cough) and (motion OR movement OR malfunction OR                                                                                                                                                                                                                                                                                                                                                             | 66  |

|                  |                          |                                                                                                                                                                                                                                                                                                                                                                                                                                                                                                              |     |
|------------------|--------------------------|--------------------------------------------------------------------------------------------------------------------------------------------------------------------------------------------------------------------------------------------------------------------------------------------------------------------------------------------------------------------------------------------------------------------------------------------------------------------------------------------------------------|-----|
|                  | (EBSCO)                  | dysfunction OR obstruction OR syndrome OR paradoxical OR irritable OR spasm* OR asthma OR stridor OR croup OR dystonia OR adduct* OR wheez* OR tense OR tension) AND (treatment OR therapy OR exercise OR biofeedback OR technique OR rehabilitation OR awareness OR control OR train* OR support OR relax OR cough OR sniff)                                                                                                                                                                                |     |
|                  |                          | Limits: Peer reviewed                                                                                                                                                                                                                                                                                                                                                                                                                                                                                        |     |
| 5/16/13          | Teacher Reference Center | ("laryngeal dyskinesia" OR "laryngeal dyskinesia" OR (Munchausen AND stridor) OR "irritable larynx" OR "functional airway obstruction" OR "paroxysmal laryngospasm" OR "inspiratory adduction" OR "laryngeal dysfunction" OR "laryngeal wheezing" OR "functional upper airway obstruction")                                                                                                                                                                                                                  | 0   |
|                  |                          | Same limits                                                                                                                                                                                                                                                                                                                                                                                                                                                                                                  |     |
| 5/16/13          | Teacher Reference Center | ("chronic cough" OR pseudoasthma OR ((false OR fictitious OR mimic* OR hysteric* OR fake) AND asthma))                                                                                                                                                                                                                                                                                                                                                                                                       | 2   |
|                  |                          | Same limits                                                                                                                                                                                                                                                                                                                                                                                                                                                                                                  |     |
| 5/16/13          | ComDisDome (ProQuest)    | (SU.EXACT("Subglottic Area") OR SU.EXACT("Vocal Folds") OR SU.EXACT("Laryngeal Structure Involvement") OR SU.EXACT("Chronic Cough")) AND (motion OR movement OR malfunction OR dysfunction OR obstruction OR syndrome OR paradoxical OR irritable OR spasm* OR asthma OR stridor OR croup OR dystonia OR adduct* OR wheez* OR tense OR tension) AND (treatment OR therapy OR exercise OR biofeedback OR technique OR rehabilitation OR awareness OR control OR train* OR support OR relax OR cough OR sniff) | 0   |
|                  |                          | SU.EXACT: Subject heading<br>Limits: Peer reviewed, English                                                                                                                                                                                                                                                                                                                                                                                                                                                  |     |
| 5/16/13, 5/17/13 | ComDisDome               | ("vocal cord" OR "vocal fold") and (motion OR movement OR malfunction OR dysfunction OR obstruction OR syndrome OR paradoxical OR irritable OR spasm* OR asthma OR stridor OR croup OR dystonia OR adduct* OR wheez* OR tense OR tension) AND (treatment OR therapy OR exercise OR biofeedback OR technique OR rehabilitation OR awareness OR control OR train* OR support OR relax OR cough OR sniff)                                                                                                       | 420 |
|                  |                          | Same limits                                                                                                                                                                                                                                                                                                                                                                                                                                                                                                  |     |
| 5/17/13          | ComDisDome               | ("laryngeal dyskinesia" OR "laryngeal dyskinesia" OR (Munchausen AND stridor) OR "irritable larynx" OR "functional airway obstruction" OR "paroxysmal laryngospasm" OR "inspiratory adduction" OR "laryngeal dysfunction" OR "laryngeal wheezing" OR "functional upper airway obstruction") AND (treatment OR therapy OR exercise OR biofeedback OR technique OR rehabilitation OR awareness OR control OR train* OR support OR relax OR cough OR sniff)                                                     | 41  |
|                  |                          | Same limits                                                                                                                                                                                                                                                                                                                                                                                                                                                                                                  |     |
| 5/17/13          | ComDisDome               | ("chronic cough" OR pseudoasthma OR ((false OR fictitious OR mimic* OR hysteric* OR fake) AND asthma)) AND (treatment OR therapy OR exercise OR biofeedback OR technique OR rehabilitation OR awareness OR control OR train* OR support OR relax OR cough OR sniff)                                                                                                                                                                                                                                          | 71  |
|                  |                          | Same limits                                                                                                                                                                                                                                                                                                                                                                                                                                                                                                  |     |

|         |                                                     |                                                                                                                                                                                                                                                                                                                                                                                                                                                                             |     |
|---------|-----------------------------------------------------|-----------------------------------------------------------------------------------------------------------------------------------------------------------------------------------------------------------------------------------------------------------------------------------------------------------------------------------------------------------------------------------------------------------------------------------------------------------------------------|-----|
| 5/17/13 | Linguistics Language Behaviour Abstracts (ProQuest) | (SU.EXACT("Vocal Folds") OR SU.EXACT("Vocal Tract") OR SU.EXACT("Phonation Structures"))<br><br>SU.Exact: Subject heading<br>Limits: Peer reviewed                                                                                                                                                                                                                                                                                                                          | 2   |
| 5/17/13 | LLBA                                                | ("vocal cord" OR "vocal fold") and (motion OR movement OR malfunction OR dysfunction OR obstruction OR syndrome OR paradoxical OR irritable OR spasm* OR asthma OR stridor OR croup OR dystonia OR adduct* OR wheez* OR tense OR tension) AND (treatment OR therapy OR exercise OR biofeedback OR technique OR rehabilitation OR awareness OR control OR train* OR support OR relax OR cough OR sniff)<br><br>Same limits                                                   | 164 |
| 5/17/13 | LLBA                                                | ("laryngeal dyskinesia" OR "laryngeal dyskinesia" OR (Munchausen AND stridor) OR "irritable larynx" OR "functional airway obstruction" OR "paroxysmal laryngospasm" OR "inspiratory adduction" OR "laryngeal dysfunction" OR "laryngeal wheezing" OR "functional upper airway obstruction") AND (treatment OR therapy OR exercise OR biofeedback OR technique OR rehabilitation OR awareness OR control OR train* OR support OR relax OR cough OR sniff)<br><br>Same limits | 13  |
| 5/17/13 | LLBA                                                | (cough OR "chronic cough" OR pseudoasthma OR ((false OR fictitious OR mimic* OR hysteric* OR fake) AND asthma)) AND (treatment OR therapy OR exercise OR biofeedback OR technique OR rehabilitation OR awareness OR control OR train* OR support OR relax OR cough OR sniff)<br><br>Same limits                                                                                                                                                                             | 52  |
| 5/20/13 | ERIC (ProQuest)                                     | ("vocal cord" OR "vocal fold") and (motion OR movement OR malfunction OR dysfunction OR obstruction OR syndrome OR paradoxical OR irritable OR spasm* OR asthma OR stridor OR croup OR dystonia OR adduct* OR wheez* OR tense OR tension)<br><br>Limits: Peer reviewed                                                                                                                                                                                                      | 13  |
| 5/20/13 | ERIC                                                | ("laryngeal dyskinesia" OR "laryngeal dyskinesia" OR (Munchausen AND stridor) OR "irritable larynx" OR "functional airway obstruction" OR "paroxysmal laryngospasm" OR "inspiratory adduction" OR "laryngeal dysfunction" OR "laryngeal wheezing" OR "functional upper airway obstruction")<br><br>Same limits                                                                                                                                                              | 0   |
| 5/20/13 | ERIC                                                | (cough OR "chronic cough" OR pseudoasthma OR ((false OR fictitious OR mimic* OR hysteric* OR fake) AND asthma)) AND (treatment OR therapy OR exercise OR biofeedback OR technique OR rehabilitation OR awareness OR control OR train* OR support OR relax OR cough OR sniff)<br><br>Same limits                                                                                                                                                                             | 42  |
| 5/20/13 | Social Services Abstracts (ProQuest)                | ("vocal cord" OR "vocal fold") and (motion OR movement OR malfunction OR dysfunction OR obstruction OR syndrome OR paradoxical OR irritable OR spasm* OR asthma OR stridor OR croup OR dystonia OR adduct* OR wheez* OR tense OR tension)<br><br>Limits: Peer reviewed                                                                                                                                                                                                      | 1   |

|                                          |                                       |                                                                                                                                                                                                                                                                                                                                                                                                                                                                         |       |
|------------------------------------------|---------------------------------------|-------------------------------------------------------------------------------------------------------------------------------------------------------------------------------------------------------------------------------------------------------------------------------------------------------------------------------------------------------------------------------------------------------------------------------------------------------------------------|-------|
| 5/20/13                                  | Social Services Abstracts             | ("laryngeal dyskinesia" OR "laryngeal dyskinesia" OR (Munchausen AND stridor) OR "irritable larynx" OR "functional airway obstruction" OR "paroxysmal laryngospasm" OR "inspiratory adduction" OR "laryngeal dysfunction" OR "laryngeal wheezing" OR "functional upper airway obstruction")                                                                                                                                                                             | 0     |
|                                          |                                       | Same limits                                                                                                                                                                                                                                                                                                                                                                                                                                                             |       |
| 5/20/13                                  | Social Services Abstracts             | (cough OR "chronic cough" OR pseudoasthma OR ((false OR fictitious OR mimic* OR hysteric* OR fake) AND asthma)) AND (treatment OR therapy OR exercise OR biofeedback OR technique OR rehabilitation OR awareness OR control OR train* OR support OR relax OR cough OR sniff)                                                                                                                                                                                            | 46    |
|                                          |                                       | Same limits                                                                                                                                                                                                                                                                                                                                                                                                                                                             |       |
| 5/20/13,<br>5/21/13,<br>5/22/13, 5/23/13 | Web of Knowledge<br>(Thomson Reuters) | Topic=("vocal cord" OR "vocal fold") AND Topic=(motion OR movement OR malfunction OR dysfunction OR obstruction OR syndrome OR paradoxical OR irritable OR spasm* OR asthma OR stridor OR croup OR dystonia OR adduct* OR wheez* OR tense OR tension) AND Topic=(treatment OR therapy OR exercise OR biofeedback OR technique OR rehabilitation OR awareness OR control OR train* OR support OR relax OR cough OR sniff)                                                | 1,457 |
|                                          |                                       | Limits: Languages=( ENGLISH ) AND Research Domains=( SCIENCE TECHNOLOGY OR SOCIAL SCIENCES ) AND Research Areas=( OTORHINOLARYNGOLOGY OR PSYCHIATRY OR PEDIATRICS OR LIFE SCIENCES BIOMEDICINE OTHER TOPICS OR AUDIOLOGY SPEECH LANGUAGE PATHOLOGY OR EMERGENCY MEDICINE OR PHYSIOLOGY OR HEALTH CARE SCIENCES SERVICES OR ALLERGY OR BEHAVIORAL SCIENCES )                                                                                                             |       |
| 5/20/13,<br>5/21/13,<br>5/22/13, 5/23/13 | Web of Knowledge                      | Topic=(("laryngeal dyskinesia" OR "laryngeal dyskinesia" OR (Munchausen AND stridor) OR "irritable larynx" OR "functional airway obstruction" OR "paroxysmal laryngospasm" OR "inspiratory adduction" OR "laryngeal dysfunction" OR "laryngeal wheezing" OR "functional upper airway obstruction")) AND Topic=(treatment OR therapy OR exercise OR biofeedback OR technique OR rehabilitation OR awareness OR control OR train* OR support OR relax OR cough OR sniff)  | 193   |
|                                          |                                       | Limits: Languages=( ENGLISH )                                                                                                                                                                                                                                                                                                                                                                                                                                           |       |
| 5/20/13,<br>5/21/13,<br>5/22/13, 5/23/13 | Web of Knowledge                      | Topic=((cough OR "chronic cough" OR pseudoasthma OR ((false OR fictitious OR mimic* OR hysteric* OR fake) AND asthma))) AND Topic=((behavior OR behavioral OR exercise OR biofeedback OR technique OR rehabilitation OR awareness OR control OR train* OR (breath AND support) OR relax OR sniff)) AND Topic=((treatment OR therapy OR exercise OR biofeedback OR technique OR rehabilitation OR awareness OR control OR train* OR support OR relax OR cough OR sniff)) | 5,736 |
|                                          |                                       | Refined by: Research Domains=( SCIENCE TECHNOLOGY OR SOCIAL SCIENCES ) AND Research Areas=( HEALTH CARE SCIENCES SERVICES OR GENERAL INTERNAL MEDICINE OR PSYCHOLOGY OR BEHAVIORAL SCIENCES OR PHYSIOLOGY OR ALLERGY OR OTORHINOLARYNGOLOGY ) AND Document Types=( ARTICLE OR ABSTRACT OR CASE REPORT OR REVIEW OR CLINICAL TRIAL ) AND Languages=( ENGLISH )                                                                                                           |       |
|                                          |                                       | Timespan=All years.<br>Search language=Auto                                                                                                                                                                                                                                                                                                                                                                                                                             |       |
| 7/3/13, 7/5/13                           | ScienceDirect                         | TITLE-ABSTR-KEY("vocal cord" OR "vocal fold") and TITLE-ABSTR-KEY(motion OR movement OR malfunction OR dysfunction OR obstruction OR syndrome OR paradoxical OR irritable OR spasm* OR asthma OR stridor OR croup OR dystonia OR adduct* OR wheez* OR tense OR tension)[Journals(Medicine and Dentistry,Nursing and Health Professions,Psychology,Social Sciences)]                                                                                                     | 583   |



|                |                                        |                                                                                                                                                                                                                                                                                                                                                                                                                                                                                                                                           |     |
|----------------|----------------------------------------|-------------------------------------------------------------------------------------------------------------------------------------------------------------------------------------------------------------------------------------------------------------------------------------------------------------------------------------------------------------------------------------------------------------------------------------------------------------------------------------------------------------------------------------------|-----|
| 7/3/13, 7/5/13 | ScienceDirect                          | TITLE-ABSTR-KEY("laryngeal dyskinesia" OR "laryngeal dyskinesia" OR (Munchausen AND stridor) OR "irritable larynx" OR "functional airway obstruction" OR "paroxysmal laryngospasm" OR "inspiratory adduction" OR "laryngeal dysfunction" OR "laryngeal wheezing") and TITLE-ABSTR-KEY(treatment OR therapy OR exercise OR biofeedback OR technique OR rehabilitation OR awareness OR control OR train* OR support OR relax OR cough OR sniff)[Journals(Medicine and Dentistry,Nursing and Health Professions,Psychology,Social Sciences)] | 23  |
| 7/3/13, 7/5/13 | ScienceDirect                          | TITLE-ABSTR-KEY("functional upper airway obstruction") and TITLE-ABSTR-KEY(treatment OR therapy OR exercise OR biofeedback OR technique OR rehabilitation OR awareness OR control OR train* OR support OR relax OR cough OR sniff)[Journals(Medicine and Dentistry,Nursing and Health Professions,Psychology,Social Sciences)]                                                                                                                                                                                                            | 2   |
| 7/3/13, 7/5/13 | ScienceDirect                          | TITLE-ABSTR-KEY("chronic cough" OR pseudoasthma OR ((false OR fictitious OR mimic* OR hysteric* OR fake) AND asthma)) and TITLE-ABSTR-KEY(treatment OR therapy OR exercise OR biofeedback OR technique OR rehabilitation OR awareness OR control OR train* OR support OR relax OR cough OR sniff)[Journals(Medicine and Dentistry,Nursing and Health Professions,Psychology,Social Sciences)]                                                                                                                                             | 384 |
| 7/5/13         | Campbell Library                       | All text =(vocal fold)                                                                                                                                                                                                                                                                                                                                                                                                                                                                                                                    | 6   |
| 7/5/13         | Campbell Library                       | All text =(vocal cold)                                                                                                                                                                                                                                                                                                                                                                                                                                                                                                                    | 9   |
| 7/5/13         | Campbell Library                       | All text =(laryngeal dyskinesia)                                                                                                                                                                                                                                                                                                                                                                                                                                                                                                          | 0   |
| 7/5/13         | Campbell Library                       | All text =(laryngeal dyskinesia)                                                                                                                                                                                                                                                                                                                                                                                                                                                                                                          | 0   |
| 7/5/13         | Campbell Library                       | All text =(munchausen's stridor)                                                                                                                                                                                                                                                                                                                                                                                                                                                                                                          | 0   |
| 7/5/13         | Campbell Library                       | All text =(stridor)                                                                                                                                                                                                                                                                                                                                                                                                                                                                                                                       | 0   |
| 7/5/13         | Campbell Library                       | All text =(irritable larynx)                                                                                                                                                                                                                                                                                                                                                                                                                                                                                                              | 1   |
| 7/5/13         | Campbell Library                       | All text =(functional airway obstruction)                                                                                                                                                                                                                                                                                                                                                                                                                                                                                                 | 49  |
| 7/5/13         | Campbell Library                       | All text =(paroxysmal laryngospasm)                                                                                                                                                                                                                                                                                                                                                                                                                                                                                                       | 0   |
| 7/5/13         | Campbell Library                       | All text =(inspiratory adduction)                                                                                                                                                                                                                                                                                                                                                                                                                                                                                                         | 0   |
| 7/5/13         | Campbell Library                       | All text =(laryngeal dysfunction)                                                                                                                                                                                                                                                                                                                                                                                                                                                                                                         | 22  |
| 7/5/13         | Campbell Library                       | All text =(laryngeal wheezing)                                                                                                                                                                                                                                                                                                                                                                                                                                                                                                            | 1   |
| 7/5/13         | Campbell Library                       | All text =(functional upper airway obstruction)                                                                                                                                                                                                                                                                                                                                                                                                                                                                                           | 91  |
| 7/5/13         | Cochrane Collaboration Library (Wiley) | "Vocal Cords"[Mesh]<br><br>Yield:<br>Cochrane Reviews 2<br>Other Reviews 2<br>Trials 82<br>Methods Studies 0<br>Technology Assessments 2<br>Economic Evaluations 1<br>Cochrane Groups 0                                                                                                                                                                                                                                                                                                                                                   | 89  |
| 7/5/13         | Cochrane Library                       | "Laryngeal Diseases"[Mesh]<br><br>Yield:<br>Cochrane Reviews 16                                                                                                                                                                                                                                                                                                                                                                                                                                                                           | 718 |

|        |                  |                                                                                                                                                                                                                                                                                                                                                                                                                                                          |     |
|--------|------------------|----------------------------------------------------------------------------------------------------------------------------------------------------------------------------------------------------------------------------------------------------------------------------------------------------------------------------------------------------------------------------------------------------------------------------------------------------------|-----|
|        |                  | Other Reviews 45<br>Trials 633<br>Methods Studies 0<br>Technology Assessments 9<br>Economic Evaluations 15<br>Cochrane Groups 0                                                                                                                                                                                                                                                                                                                          |     |
| 7/5/13 | Cochrane Library | ("vocal cord" OR "vocal fold") and (motion OR movement OR malfunction OR dysfunction obstruction OR syndrome OR paradoxical OR irritable OR spasm* OR asthma OR stridor OR croup OR dystonia OR adduct* OR wheez* OR tense OR tension) AND (treatment OR therapy OR exercise OR biofeedback OR technique OR rehabilitation OR awareness OR control OR train* OR support OR relax OR cough OR sniff)                                                      | 99  |
|        |                  | Yield:<br>Cochrane Reviews 30<br>Other Reviews 2<br>Trials 65<br>Methods Studies 0<br>Technology Assessments 0<br>Economic Evaluations 1<br>Cochrane Groups 1                                                                                                                                                                                                                                                                                            |     |
| 7/5/13 | Cochrane Library | ("laryngeal dyskinesia" OR "laryngeal dyskinesia" OR (Munchausen AND stridor) OR "irritable larynx" OR "functional airway obstruction" OR "paroxysmal laryngospasm" OR "inspiratory adduction" OR "laryngeal dysfunction" OR "laryngeal wheezing" OR "functional upper airway obstruction") AND (treatment OR therapy OR exercise OR biofeedback OR technique OR rehabilitation OR awareness OR control OR train* OR support OR relax OR cough OR sniff) | 6   |
|        |                  | Yield:<br>Cochrane Reviews 2<br>Other Reviews 0<br>Trials 4<br>Methods Studies 0<br>Technology Assessments 0<br>Economic Evaluations 0<br>Cochrane Groups 0                                                                                                                                                                                                                                                                                              |     |
| 7/5/13 | Cochrane Library | ("chronic cough" OR pseudoasthma OR ((false OR fictitious OR mimic* OR hysteric* OR fake) AND asthma)) AND (treatment OR therapy OR exercise OR biofeedback OR technique OR rehabilitation OR awareness OR control OR train* OR support OR relax OR cough OR sniff)                                                                                                                                                                                      | 349 |
|        |                  | Yield:<br>Cochrane Reviews 145<br>Other Reviews 7<br>Trials 182<br>Methods Studies 2                                                                                                                                                                                                                                                                                                                                                                     |     |

|        |                                                                  |                                                                                                                                                                                                                                                                                                                                                                                                                                                                                  |    |
|--------|------------------------------------------------------------------|----------------------------------------------------------------------------------------------------------------------------------------------------------------------------------------------------------------------------------------------------------------------------------------------------------------------------------------------------------------------------------------------------------------------------------------------------------------------------------|----|
|        |                                                                  | Technology Assessments 2<br>Economic Evaluations 8<br>Cochrane Groups 3                                                                                                                                                                                                                                                                                                                                                                                                          |    |
| 7/5/13 | Centre for Reviews and Dissemination Database (CRD)              | "Vocal Cords"[Mesh]                                                                                                                                                                                                                                                                                                                                                                                                                                                              | 5  |
| 7/5/13 | CRD Database                                                     | "Laryngeal Diseases"[Mesh]                                                                                                                                                                                                                                                                                                                                                                                                                                                       | 76 |
| 7/5/13 | CRD Database                                                     | Any Field =("vocal cord" OR "vocal fold") AND Any Field = (motion OR movement OR malfunction OR dysfunction OR obstruction OR syndrome OR paradoxical OR irritable OR spasm* OR asthma OR stridor OR croup OR dystonia OR adduct* OR wheez* OR tense OR tension) AND Any Field = (treatment OR therapy OR exercise OR biofeedback OR technique OR rehabilitation OR awareness OR control OR train* OR support OR relax OR cough OR sniff)                                        | 5  |
| 7/5/13 | CRD Database                                                     | Any Field = ("laryngeal dyskinesia" OR "laryngeal dyskinesia" OR (Munchausen AND stridor) OR "irritable larynx" OR "functional airway obstruction" OR "paroxysmal laryngospasm" OR "inspiratory adduction" OR "laryngeal dysfunction" OR "laryngeal wheezing" OR "functional upper airway obstruction") AND Any Field = (treatment OR therapy OR exercise OR biofeedback OR technique OR rehabilitation OR awareness OR control OR train* OR support OR relax OR cough OR sniff) | 0  |
| 7/5/13 | CRD Database                                                     | All Field =("chronic cough" OR pseudoasthma OR ((false OR fictitious OR mimic* OR hysteric* OR fake) AND asthma)) AND Any Field =(treatment OR therapy OR exercise OR biofeedback OR technique OR rehabilitation OR awareness OR control OR train* OR support OR relax OR cough OR sniff)                                                                                                                                                                                        | 68 |
| 7/5/13 | Latin American and Caribbean Health Sciences Literature (LILACS) | Words = ("vocal cord" OR "vocal fold") AND Words = (motion OR movement OR malfunction OR dysfunction OR obstruction OR syndrome OR paradoxical OR irritable OR spasm OR asthma OR stridor OR croup OR dystonia OR adduction OR adduct OR wheeze OR wheezing OR tense OR tension)                                                                                                                                                                                                 | 46 |
| 7/5/13 | LILACS                                                           | Words = ("laryngeal dyskinesia" OR "laryngeal dyskinesia" OR (Munchausen AND stridor) OR "irritable larynx" OR "functional airway obstruction" OR "paroxysmal laryngospasm" OR "inspiratory adduction" OR "laryngeal dysfunction" OR "laryngeal wheezing" OR "functional upper airway obstruction")                                                                                                                                                                              | 0  |
| 7/5/13 | LILACS                                                           | Words = ("chronic cough" OR pseudoasthma OR ((false OR fictitious OR mimic* OR hysteric* OR fake) AND asthma))                                                                                                                                                                                                                                                                                                                                                                   | 0  |
| 7/5/13 | REHABDATA                                                        | "vocal cord"                                                                                                                                                                                                                                                                                                                                                                                                                                                                     | 15 |
| 7/5/13 | REHABDATA                                                        | "vocal fold"                                                                                                                                                                                                                                                                                                                                                                                                                                                                     | 21 |
| 7/5/13 | REHABDATA                                                        | "laryngeal dyskinesia"                                                                                                                                                                                                                                                                                                                                                                                                                                                           | 0  |
| 7/5/13 | REHABDATA                                                        | "laryngeal dyskinesia"                                                                                                                                                                                                                                                                                                                                                                                                                                                           | 0  |
| 7/5/13 | REHABDATA                                                        | "Munchausen's stridor"                                                                                                                                                                                                                                                                                                                                                                                                                                                           | 0  |
| 7/5/13 | REHABDATA                                                        | "irritable larynx"                                                                                                                                                                                                                                                                                                                                                                                                                                                               | 0  |
| 7/5/13 | REHABDATA                                                        | "functional airway obstruction"                                                                                                                                                                                                                                                                                                                                                                                                                                                  | 0  |
| 7/5/13 | REHABDATA                                                        | "paroxysmal laryngospasm"                                                                                                                                                                                                                                                                                                                                                                                                                                                        | 0  |
| 7/5/13 | REHABDATA                                                        | "inspiratory adduction"                                                                                                                                                                                                                                                                                                                                                                                                                                                          | 0  |
| 7/5/13 | REHABDATA                                                        | "laryngeal dysfunction"                                                                                                                                                                                                                                                                                                                                                                                                                                                          | 0  |

|        |               |                                                                                                                                                                                                                                                                                                                                                                                        |     |
|--------|---------------|----------------------------------------------------------------------------------------------------------------------------------------------------------------------------------------------------------------------------------------------------------------------------------------------------------------------------------------------------------------------------------------|-----|
| 7/5/13 | REHABDATA     | "laryngeal wheezing"                                                                                                                                                                                                                                                                                                                                                                   | 0   |
| 7/5/13 | REHABDATA     | "functional upper airway obstruction"                                                                                                                                                                                                                                                                                                                                                  | 0   |
| 7/5/13 | REHABDATA     | "chronic cough"                                                                                                                                                                                                                                                                                                                                                                        | 3   |
| 7/5/13 | REHABDATA     | pseudoasthma                                                                                                                                                                                                                                                                                                                                                                           | 0   |
| 7/5/13 | REHABDATA     | (false OR fictitious OR mimic OR hysteric OR hysterical OR fake) AND asthma                                                                                                                                                                                                                                                                                                            | 0   |
| 7/5/13 | speechBITE    | Target Area = Voice (All) AND Intervention = Voice Therapy                                                                                                                                                                                                                                                                                                                             | 348 |
| 7/5/13 | Trip Database | ("vocal cord") and (motion OR movement OR malfunction OR dysfunction OR obstruction OR syndrome OR paradoxical OR irritable OR spasm* OR asthma OR stridor OR croup OR dystonia OR adduct* OR wheez* OR tense OR tension) AND (treatment OR therapy OR exercise OR biofeedback OR technique OR rehabilitation OR awareness OR control OR train* OR support OR relax OR cough OR sniff) | 750 |
|        |               | All Secondary Evidence                                                                                                                                                                                                                                                                                                                                                                 |     |
|        |               | -Evidence-based Synopses 11                                                                                                                                                                                                                                                                                                                                                            |     |
|        |               | -Systematic Review 17                                                                                                                                                                                                                                                                                                                                                                  |     |
|        |               | -Guidelines                                                                                                                                                                                                                                                                                                                                                                            |     |
|        |               | --Aus & NZ 2                                                                                                                                                                                                                                                                                                                                                                           |     |
|        |               | --Canada 2                                                                                                                                                                                                                                                                                                                                                                             |     |
|        |               | --UK 24                                                                                                                                                                                                                                                                                                                                                                                |     |
|        |               | --USA 34                                                                                                                                                                                                                                                                                                                                                                               |     |
|        |               | --Other 1                                                                                                                                                                                                                                                                                                                                                                              |     |
|        |               | Clinical Q&A 0                                                                                                                                                                                                                                                                                                                                                                         |     |
|        |               | Key Primary Research 1                                                                                                                                                                                                                                                                                                                                                                 |     |
|        |               | Controlled Trials 80                                                                                                                                                                                                                                                                                                                                                                   |     |
|        |               | Extended Primary Research 245                                                                                                                                                                                                                                                                                                                                                          |     |
|        |               | Case reports 16                                                                                                                                                                                                                                                                                                                                                                        |     |
|        |               | eTextbooks 317                                                                                                                                                                                                                                                                                                                                                                         |     |
| 7/5/13 | Trip Database | ("vocal fold") and (motion OR movement OR malfunction OR dysfunction OR obstruction OR syndrome OR paradoxical OR irritable OR spasm* OR asthma OR stridor OR croup OR dystonia OR adduct* OR wheez* OR tense OR tension) AND (treatment OR therapy OR exercise OR biofeedback OR technique OR rehabilitation OR awareness OR control OR train* OR support OR relax OR cough OR sniff) | 328 |
|        |               | All Secondary Evidence                                                                                                                                                                                                                                                                                                                                                                 |     |
|        |               | -Evidence-based Synopses 3                                                                                                                                                                                                                                                                                                                                                             |     |
|        |               | -Systematic Review 1                                                                                                                                                                                                                                                                                                                                                                   |     |
|        |               | -Guidelines                                                                                                                                                                                                                                                                                                                                                                            |     |
|        |               | --Aus & NZ 0                                                                                                                                                                                                                                                                                                                                                                           |     |
|        |               | --Canada 0                                                                                                                                                                                                                                                                                                                                                                             |     |
|        |               | --UK 2                                                                                                                                                                                                                                                                                                                                                                                 |     |
|        |               | --USA 0                                                                                                                                                                                                                                                                                                                                                                                |     |
|        |               | --Other 0                                                                                                                                                                                                                                                                                                                                                                              |     |
|        |               | Clinical Q&A 0                                                                                                                                                                                                                                                                                                                                                                         |     |

|        |               |                                                                                                                                                                                                                                                                                                                                                                                                                                                                      |       |
|--------|---------------|----------------------------------------------------------------------------------------------------------------------------------------------------------------------------------------------------------------------------------------------------------------------------------------------------------------------------------------------------------------------------------------------------------------------------------------------------------------------|-------|
|        |               | Key Primary Research 0<br>Controlled Trials 15<br>Extended Primary Research 240<br>Case reports 2<br>eTextbooks 65                                                                                                                                                                                                                                                                                                                                                   |       |
| 7/5/13 | Trip Database | ("laryngeal dyskinesia" OR "laryngeal dyskinesia" OR (Munchausen AND stridor) OR "irritable larynx"<br>OR "functional airway obstruction" OR "paroxysmal laryngospasm" OR "inspiratory adduction" OR<br>"laryngeal dysfunction" OR "laryngeal wheezing" OR "functional upper airway obstruction") AND<br>(treatment OR therapy OR exercise OR biofeedback OR technique OR rehabilitation OR awareness OR<br>control OR train* OR support OR relax OR cough OR sniff) | 45    |
|        |               | All Secondary Evidence<br>-Evidence-based Synopses 1<br>-Systematic Review 0<br>-Guidelines<br>--Aus & NZ 0<br>--Canada 0<br>--UK 0<br>--USA 2<br>--Other 0<br>Clinical Q&A 0<br>Key Primary Research 0<br>Controlled Trials 10<br>Extended Primary Research 17<br>Case reports 3<br>eTextbooks 15                                                                                                                                                                   |       |
| 7/5/13 | Trip Database | ("chronic cough" OR pseudoasthma OR ((false OR fictitious OR mimic* OR hysteric* OR fake) AND<br>asthma)) AND (treatment OR therapy OR exercise OR biofeedback OR technique OR rehabilitation OR<br>awareness OR control OR train* OR support OR relax OR cough OR sniff)                                                                                                                                                                                            | 1,628 |
|        |               | All Secondary Evidence<br>-Evidence-based Synopses 58<br>-Systematic Review 65<br>-Guidelines<br>--Aus & NZ 37<br>--Canada 33<br>--UK 120<br>--USA 155<br>--Other 28<br>Clinical Q&A 6<br>Key Primary Research 22<br>Controlled Trials 135<br>Extended Primary Research 446 #381, p.8                                                                                                                                                                                |       |

|                            |               |                                                                                                                                                                                                                                                                                                                                                                                                                                                          |                                                      |
|----------------------------|---------------|----------------------------------------------------------------------------------------------------------------------------------------------------------------------------------------------------------------------------------------------------------------------------------------------------------------------------------------------------------------------------------------------------------------------------------------------------------|------------------------------------------------------|
|                            |               | Case reports 27<br>eTextbooks 496                                                                                                                                                                                                                                                                                                                                                                                                                        |                                                      |
| 7/8/13, 7/9/13,<br>7/10/13 | GoogleScholar | ("vocal cord" OR "vocal fold") AND (motion OR movement OR malfunction OR dysfunction OR obstruction OR syndrome OR paradoxical OR irritable OR spasm* OR asthma OR stridor OR croup OR dystonia OR adduct* OR wheez* OR tense OR tension) AND (treatment OR therapy OR exercise OR biofeedback OR technique OR rehabilitation OR awareness OR control OR train* OR support OR relax OR cough OR sniff)                                                   | ~15,600<br>Unable to view<br>results beyond<br>1,000 |
| 7/9/13                     | GoogleScholar | ("laryngeal dyskinesia" OR "laryngeal dyskinesia" OR (Munchausen AND stridor) OR "irritable larynx" OR "functional airway obstruction" OR "paroxysmal laryngospasm" OR "inspiratory adduction" OR "laryngeal dysfunction" OR "laryngeal wheezing" OR "functional upper airway obstruction") AND (treatment OR therapy OR exercise OR biofeedback OR technique OR rehabilitation OR awareness OR control OR train* OR support OR relax OR cough OR sniff) | 469                                                  |
| 7/9/13, 7/10/13            | GoogleScholar | ("chronic cough" OR pseudoasthma OR ((false OR fictitious OR mimic* OR hysteric* OR fake) AND asthma)) AND ("vocal cord" OR "vocal fold") AND (treatment OR therapy OR exercise OR biofeedback OR technique OR rehabilitation OR awareness OR control OR train* OR support OR relax OR cough OR sniff)                                                                                                                                                   | ~3,860<br>Unable to view<br>results beyond<br>1,000  |
