# Supplementary material
Source: publisher figshare collection journal article supplement (https://asha.figshare.com/articles/dataset/_/6170243)
Supplement: Supplementary file 3 [file 1]

## ONLINE SUPPLEMENTAL MATERIALS – TABLE S2

**Table S2**

*State of the Evidence Pertaining to SLP Treatment for Individuals with PVFM: Descriptive and Quantitative Outcomes*

| Study design                    | Citation                           | Outcome type<br>(quantitative/<br>descriptive) | Outcome measure                                        | Pre tx data                                                                     | Post tx results/ <i>follow-up</i><br><i>results</i>                                       | Effect size/ p-value                                                                      |
|---------------------------------|------------------------------------|------------------------------------------------|--------------------------------------------------------|---------------------------------------------------------------------------------|-------------------------------------------------------------------------------------------|-------------------------------------------------------------------------------------------|
| Randomized<br>controlled trials | Nacci et al.<br>(2011)             | Quantitative                                   | # of dyspnea<br>episodes/month                         | Low frequency tx group (A):<br>M= 9.6<br>High frequency tx group (B):<br>M= 9.9 | A: M= 7.2<br>B: M= 0.9                                                                    | Within-group:<br>A: $p < .01$<br>B: $p < .01$<br>Between-group:<br>$p < .01$ (favoring B) |
|                                 |                                    | Quantitative                                   | Dyspnea ratings (based<br>on 0-10 scale,<br>10=severe) | Low frequency tx group (A):<br>M=9.2<br>High frequency tx group (B):<br>M=9.3   | A: M=M=6.2<br>B: M=M=2.5                                                                  | Within-group:<br>A: $p < .01$<br>B: $p < .01$<br>Between-group: $p < .01$<br>(favoring B) |
|                                 | Vertigan et al.<br>(2008)          | (See full manuscript, Table 2)                 |                                                        |                                                                                 |                                                                                           |                                                                                           |
| Single subject                  | Mathers-Schmidt &<br>Brilla (2005) | (See full manuscript, Table 1)                 |                                                        |                                                                                 |                                                                                           |                                                                                           |
| Pre-post<br>designs             | Murry et al.<br>(2006)             | Quantitative                                   | FVC                                                    | 39 - 129% predicted (M=89.5%)                                                   | 44 – 127% predicted<br>(M=95.3%)<br><i>88 – 124% predicted</i><br><i>(M=101.2%) (N=9)</i> | NS                                                                                        |
|                                 |                                    | Quantitative                                   | FIV <sub>1</sub> /FIVC                                 | 0.37 – 1.0 (M=0.89)                                                             | 0.85 – 1.0 (M=0.97)<br><i>0.96 – 1.0 (M=0.99) (N=9)</i>                                   | NS                                                                                        |
|                                 |                                    | Quantitative                                   | FIV <sub>.5</sub> /FIVC                                | 0.32 – 0.86 (M=0.62)                                                            | 0.44 – 0.96 (M=0.81)<br><i>0.77 – 0.95 (M=0.88) (N=9)</i>                                 | Within-group: $p \leq .001$<br>(improvement)                                              |
|                                 | Ryan et al.<br>(2009)              | Quantitative                                   | FVC                                                    | Median= 99.6% predicted (IQR=<br>29.1)                                          | Median= 93.1% predicted<br>(IQR=15.0)                                                     | NS                                                                                        |

|             |                           |              |                                               |                                                                                     |                                                                                                                                                                                |                                             |
|-------------|---------------------------|--------------|-----------------------------------------------|-------------------------------------------------------------------------------------|--------------------------------------------------------------------------------------------------------------------------------------------------------------------------------|---------------------------------------------|
|             |                           | Quantitative | FEV <sub>1</sub> (% predicted)                | Median= 90.8 (SEM=19.3)                                                             | Median= 90.7 (SEM=18.3)                                                                                                                                                        | NS                                          |
|             |                           | Quantitative | FIF <sub>50</sub>                             | Median=2.97 L (IQR = 1.72 L)<br>Median= 78.3% predicted (IQR= 30.0%)                | Median= 2.85 L (IQR=1.10 L)<br>Median= 70.6% predicted (IQR= 24.4%)                                                                                                            | NS                                          |
|             |                           | Quantitative | FEV <sub>1</sub> /FVC                         | Median= 0.82 (IQR= 0.08)                                                            | Median= 0.82 (IQR=0.011)                                                                                                                                                       | NS                                          |
|             |                           | Quantitative | FENO                                          | Median= 13.7 (IQR= 8.8)                                                             | Median=12.9 (IQR=7.6)                                                                                                                                                          | NS                                          |
|             |                           | Descriptive  | Laryngoscopy                                  | 10/10 participants observed to show adduction of VF                                 | 8/10 participants with resolved PVFM                                                                                                                                           | $p = .039$                                  |
|             |                           | Quantitative | Ratings of laryngeal dysfunction (using LDQ)  | Median = 5 (IQR= 4)                                                                 | Median=3.5 (IQR=4)                                                                                                                                                             | Within-group<br>$p = .008$<br>(improvement) |
| Case series | Chiang et al. (2013)      | Descriptive  | Report of PVFM symptoms                       | 64/64 participants demonstrated signs and symptoms of PVFM                          | 48/64 participants demonstrated complete resolution of symptoms                                                                                                                | NR, not calculable                          |
|             | Christopher et al. (1983) | Descriptive  | Report of PVFM symptoms                       | 5/5 participants with "dramatic episodes of wheezing"                               | 5/5 participants with reduction in number and severity of PVFM attacks                                                                                                         | NR, not calculable                          |
|             | Doshi & Weinberger (2006) | Descriptive  | Report of PVFM symptoms                       | 8/8 participants reported PVFM symptoms                                             | 7/8 participants reported being asymptomatic                                                                                                                                   | NR, not calculable                          |
|             | Maturo et al. (2011)      | Descriptive  | Report of PVFM symptoms and/or activity level | 56/56 participants with symptoms at rest or during exercise                         | 35/56 participants were asymptomatic and/or were able to return to activity.<br><br><i>These patients did not report any change in symptom or activity level at follow-up.</i> | NR, not calculable                          |
|             |                           | Descriptive  | Report of PVFM symptoms and/or activity level | Initial speech therapy only group: 38/38 participants presented with PVFM symptoms. | Initial speech therapy only group: 24/38 participants were asymptomatic and/or were able to return to activity.                                                                | $p = .001$                                  |

|                      |              |                                               |                                                                                                                                                                |                                                                                                                                                                                                                          |                                        |
|----------------------|--------------|-----------------------------------------------|----------------------------------------------------------------------------------------------------------------------------------------------------------------|--------------------------------------------------------------------------------------------------------------------------------------------------------------------------------------------------------------------------|----------------------------------------|
|                      |              |                                               | Initial PPI only group: 7/7 participants presented with PVFM symptoms at rest or during exercise.                                                              | Initial PPI only group: 0/7 participants were asymptomatic and/or were able to return to activity                                                                                                                        |                                        |
|                      | Descriptive  | Report of PVFM symptoms and/or activity level | Initial speech therapy only group: 38/38 participants presented with PVFM symptoms.<br>Speech therapy + PPI group: 6 participants presented with PVFM symptoms | Initial speech therapy only group: 24/38 participants were asymptomatic and/or were able to return to activity.<br>Speech therapy + PPI group: 5/6 participants were asymptomatic and/or were able to return to activity | $p = .65$                              |
| Murry et al. (2004)  | Quantitative | FVC                                           | 2.36 -3.76 L (M=3.11 L);<br>83 – 105% predicted (M=92%)                                                                                                        | 2.33 – 3.81 L (M=3.18 L);<br>90 – 99% predicted (M=95%)                                                                                                                                                                  | NS                                     |
|                      | Quantitative | FIV <sub>5</sub> /FIVC                        | 0.32 – 0.7 (M=0.58)                                                                                                                                            | 0.89 – 0.99 (M=0.94)                                                                                                                                                                                                     | Significant ( $p$ -value not reported) |
| Murry et al. (2010)  | Descriptive  | Laryngoscopy                                  | 16/16 participants showed PVFM during oral and/or nasal quiet breathing                                                                                        | 12/16 participants showed PVFM resolution.<br>3/16 participants showed improved PVFM.<br>1/16 participants continued to show PVFM during quiet breathing                                                                 | NR, not calculable                     |
|                      | Descriptive  | Presence/absence of dyspnea                   | 7/16 clients with dyspnea present                                                                                                                              | 2/16 clients with dyspnea present                                                                                                                                                                                        | $p > .01$ NS                           |
|                      | Descriptive  | Presence/absence of hoarseness                | 8/16 with complaints of hoarseness                                                                                                                             | 1/16 with complaints of hoarseness                                                                                                                                                                                       | $p \leq .01$                           |
| Powell et al. (2007) | Descriptive  | Report of PVFM symptoms                       | 14/14 participants with audible inspiratory stridor and 13/14 with additional PVFM symptoms                                                                    | 14/14 participants achieved resolution or significant improvement of PVFM symptoms                                                                                                                                       | NR, not calculable                     |

|              |                           |             |                         |                                                                                                             |                                                                                                                                                                                                                     |                    |
|--------------|---------------------------|-------------|-------------------------|-------------------------------------------------------------------------------------------------------------|---------------------------------------------------------------------------------------------------------------------------------------------------------------------------------------------------------------------|--------------------|
|              | Rameau et al. (2012)      | Descriptive | Report of PVFM symptoms | 22/22 participants with PVFM symptoms either with or without exercise                                       | <i>19/22 participants reported improvement in PVFM symptom frequency or severity</i>                                                                                                                                | NR, not calculable |
|              | Sullivan et al. (2001)    | Descriptive | Report of PVFM symptoms | 20/20 participants reported PVFM symptoms during exercise                                                   | <i>19/20 participants reported the ability to control symptoms<br/>13/20 reported no PVFM episodes<br/>6/20 reported one to three uncontrolled PVFM episodes<br/>1/20 reported continued frequent PVFM episodes</i> | NR, not calculable |
|              | Towey et al. (2012)       | Descriptive | Report of PVFM symptoms | 7/7 participants reported PVFM symptoms                                                                     | 7/7 participants reported PVFM symptom resolution                                                                                                                                                                   | NR, not calculable |
| Case studies | Altman et al. (2000)      | Descriptive | Report of PVFM symptoms | Symptoms of PVFM                                                                                            | 1/2: Symptoms resolved or improved<br>1/2: No improvement or decline in symptoms                                                                                                                                    | NR, not calculable |
|              | Archer et al. (2000)      | Descriptive | Report of PVFM symptoms | Symptoms of PVFM                                                                                            | No improvement or decline in symptoms                                                                                                                                                                               | NR, not calculable |
|              | Bahrainwala et al. (2001) | Descriptive | Report of PVFM symptoms | Symptoms of PVFM                                                                                            | Symptoms resolved or improved                                                                                                                                                                                       | NR, not calculable |
|              |                           | Descriptive | Flow volume loops       | Attenuation of the inspiratory flow volume loop and abrupt drop and rise of the expiratory flow volume loop | Normal flow volume loops                                                                                                                                                                                            | NR, not calculable |
|              | Barnes et al. (1986)      | Descriptive | Report of PVFM symptoms | Symptoms of PVFM                                                                                            | No improvement or decline in symptoms                                                                                                                                                                               | NR, not calculable |
|              | Bittleman et al. (1994)   | Descriptive | Report of PVFM symptoms | Symptoms of PVFM                                                                                            | Symptoms resolved or improved                                                                                                                                                                                       | NR, not calculable |
|              | Campaignha et             | Descriptive | Report of PVFM          | Symptoms of PVFM                                                                                            | Symptoms resolved or                                                                                                                                                                                                | NR, not calculable |

| al. (2012)               |              | symptoms                                               |                                      | improved                                                                                |                    |
|--------------------------|--------------|--------------------------------------------------------|--------------------------------------|-----------------------------------------------------------------------------------------|--------------------|
| Chawla et al. (1984)     | Descriptive  | Report of PVFM symptoms                                | Symptoms of PVFM                     | No improvement or decline in symptoms                                                   | NR, not calculable |
| Chiang et al. (2008)     | Descriptive  | Report of PVFM symptoms                                | Symptoms of PVFM                     | Symptoms resolved or improved                                                           | NR, not calculable |
| Corren & Newman (1992)   | Descriptive  | Report of PVFM symptoms                                | Symptoms of PVFM                     | Symptoms resolved or improved                                                           | NR, not calculable |
| Craig et al. (1992)      | Descriptive  | Report of PVFM symptoms                                | Symptoms of PVFM                     | No improvement or decline in symptoms                                                   | NR, not calculable |
| Earles et al. (2003)     | Descriptive  | Report of PVFM symptoms                                | Symptoms of PVFM                     | Symptoms resolved or improved                                                           | NR, not calculable |
| Echternach et al. (2008) | Descriptive  | Report of PVFM symptoms                                | Symptoms of PVFM                     | Symptoms resolved or improved                                                           | NR, not calculable |
| Harbison et al. (2000)   | Descriptive  | Laryngoscopy                                           | Vocal fold adduction while breathing | Normal vocal fold motion                                                                | NR, not calculable |
|                          | Quantitative | PIFR                                                   | 36% predicted                        | 79%                                                                                     | NR, not calculable |
| Hatzelis & Murry (2012)  | Quantitative | Laryngoscopy                                           | >50% VF adduction on inspiration     | >50% VF adduction (at end of treatment)<br><50% VF adduction (at 1 and 3 mo. follow up) | NR, not calculable |
|                          | Quantitative | Dyspnea severity rating (based on 1-5 scale, 5=severe) | 4.5                                  | 2 (at end of treatment)<br>1.5 (at 1 mo. follow up)<br>1 (at 3 mo. and 1 yr. follow up) | NR, not calculable |
|                          | Quantitative | FVC                                                    | 4.82 L                               | 4.89 L                                                                                  | NR, not calculable |
|                          | Quantitative | % predicted value                                      | 107                                  | 109                                                                                     | NR, not calculable |
|                          | Quantitative | FIV <sub>.5</sub> /FIVC                                | .71                                  | .74                                                                                     | NR, not calculable |

|                           |              |                                 |                     |                                                                                  |                    |
|---------------------------|--------------|---------------------------------|---------------------|----------------------------------------------------------------------------------|--------------------|
|                           | Quantitative | FEV <sub>1</sub> /FVC           | .79                 | .79                                                                              | NR, not calculable |
| Hayes et al. (1993)       | Descriptive  | Report of PVFM symptoms         | Symptoms of PVFM    | 3/3: No improvement or decline in symptoms                                       | NR, not calculable |
| Kayani et al. (1998)      | Descriptive  | Report of PVFM symptoms         | Symptoms of PVFM    | 2/2: Symptoms resolved or improved                                               | NR, not calculable |
| Kivity et al. (1986)      | Descriptive  | Report of PVFM symptoms         | Symptoms of PVFM    | Symptoms resolved or improved                                                    | NR, not calculable |
| Koester & Amundson (2002) | Descriptive  | Report of PVFM symptoms         | Symptoms of PVFM    | Symptoms resolved or improved                                                    | NR, not calculable |
| Leo & Konakanchi (1999)   | Descriptive  | Report of PVFM symptoms         | Symptoms of PVFM    | Symptoms resolved or improved                                                    | NR, not calculable |
| Marsh et al. (1994)       | Descriptive  | Report of PVFM symptoms         | Symptoms of PVFM    | Symptoms resolved or improved                                                    | NR, not calculable |
| Maschka et al. (1997)     | Descriptive  | Report of PVFM symptoms         | Symptoms of PVFM    | 1/2: No improvement or decline in symptoms<br>1/2: Symptoms resolved or improved | NR, not calculable |
| Mathers-Schmidt (2001)    | Descriptive  | Report of PVFM symptoms         | Symptoms of PVFM    | 1/2: Symptoms resolved or improved<br>1/2: No improvement or decline in symptoms | NR, not calculable |
| Mobeireek et al. (1995)   | Descriptive  | Report of PVFM symptoms         | Symptoms of PVFM    | 2/2: Symptoms resolved or improved                                               | NR, not calculable |
| Mullinax & Kuhn (1996)    | Descriptive  | Report of PVFM symptoms         | Symptoms of PVFM    | Symptoms resolved or improved                                                    | NR, not calculable |
| Murry (1998)              | Quantitative | Speaking F <sub>0</sub> (range) | 191 Hz (178-216 Hz) | 201 Hz (188-242 Hz)                                                              | NR, not calculable |
|                           | Quantitative | Sustained /a/                   | 9 seconds           | 16 seconds                                                                       | NR, not calculable |

|                           |              |                                                |                                                |                                                                                                         |                    |
|---------------------------|--------------|------------------------------------------------|------------------------------------------------|---------------------------------------------------------------------------------------------------------|--------------------|
| Nacci et al. (2007)       | Descriptive  | Report of PVFM symptoms                        | Symptoms of PVFM                               | 3/3: Symptoms resolved or improved                                                                      | NR, not calculable |
| Niven et al. (1992)       | Descriptive  | Report of PVFM symptoms                        | Symptoms of PVFM                               | 1/3: No improvement or decline in symptoms (Case 1)<br>2/3: Symptoms resolved or improved (Cases 2 & 3) | NR, not calculable |
| Pinho et al. (1997)       | Descriptive  | Laryngoscopy                                   | Atypical movements of the arytenoid cartilages | Paradoxical arytenoid movement controlled                                                               | NR, not calculable |
|                           | Descriptive  | Report of PVFM symptoms                        | Symptoms of PVFM                               | Symptoms resolved or improved                                                                           | NR, not calculable |
| Reisner & Nelson (1997)   | Descriptive  | Report of PVFM symptoms                        | Symptoms of PVFM                               | 4/4: Symptoms resolved or improved                                                                      | NR, not calculable |
| Renz et al. (2000)        | Descriptive  | Report of PVFM symptoms                        | Symptoms of PVFM                               | 2/2: Symptoms resolved or improved                                                                      | NR, not calculable |
| Rhodes (2008)             | Descriptive  | Report of PVFM symptoms                        | Symptoms of PVFM                               | Symptoms resolved or improved                                                                           | NR, not calculable |
| Rogers & Stell (1978)     | Descriptive  | Report of PVFM symptoms                        | Symptoms of PVFM                               | 2/2 Symptoms resolved or improved                                                                       | NR, not calculable |
| Ruddy et al. (2004)       | Quantitative | Dyspnea ratings (based on 0-5 scale, 5=severe) | 5                                              | 1.5                                                                                                     | NR, not calculable |
|                           | Quantitative | Maximum inspiratory pressure                   | 73 cm H <sub>2</sub> O                         | 166 cm H <sub>2</sub> O                                                                                 | NR, not calculable |
|                           | Quantitative | Maximum duration of rowing activity            | 0 minutes                                      | 18 minutes                                                                                              | NR, not calculable |
| Rusakow et al. (1991)     | Descriptive  | Report of PVFM symptoms                        | Symptoms of PVFM                               | Symptoms resolved or improved                                                                           | NR, not calculable |
| Sandage & Zelanzny (2004) | Descriptive  | Report of PVFM symptoms                        | Symptoms of PVFM                               | Symptoms resolved or improved                                                                           | NR, not calculable |

|                             |             |                         |                               |                                       |                    |
|-----------------------------|-------------|-------------------------|-------------------------------|---------------------------------------|--------------------|
| Sette et al. (1993)         | Descriptive | Report of PVFM symptoms | Symptoms of PVFM              | Symptoms resolved or improved         | NR, not calculable |
| Shao et al. (1995)          | Descriptive | Pulmonary function test | Reduced inspiratory flow rate | Normal flow volume curve              | NR, not calculable |
|                             | Descriptive | Report of PVFM symptoms | Symptoms of PVFM              | Symptoms resolved or improved         | NR, not calculable |
| Sharma & Singh (2007)       | Descriptive | Report of PVFM symptoms | Symptoms of PVFM              | Symptoms resolved or improved         | NR, not calculable |
| Skinner & Bradley (1989)    | Descriptive | Report of PVFM symptoms | Symptoms of PVFM              | Symptoms resolved or improved         | NR, not calculable |
| Smith et al. (1993)         | Descriptive | Report of PVFM symptoms | Symptoms of PVFM              | Symptoms resolved or improved         | NR, not calculable |
| Suri et al. (2002)          | Descriptive | Report of PVFM symptoms | Symptoms of PVFM              | No improvement or decline in symptoms | NR, not calculable |
| Suttithawil et al. (2006)   | Descriptive | Report of PVFM symptoms | Symptoms of PVFM              | Symptoms resolved or improved         | NR, not calculable |
| Tajchman & Gitterman (1996) | Descriptive | Report of PVFM symptoms | Symptoms of PVFM              | Symptoms resolved or improved         | NR, not calculable |
| Tan et al. (1997)           | Descriptive | Report of PVFM symptoms | Symptoms of PVFM              | Symptoms resolved or improved         | NR, not calculable |
| Tilles (2010)               | Descriptive | Report of PVFM symptoms | Symptoms of PVFM              | Symptoms resolved or improved         | NR, not calculable |
| Von Berg et al. (1999)      | Descriptive | Report of PVFM symptoms | Symptoms of PVFM              | 2/2: Symptoms resolved or improved    | NR, not calculable |
| Walaschek et al. (2010)     | Descriptive | Report of PVFM symptoms | Symptoms of PVFM              | Symptoms resolved or improved         | NR, not calculable |
| Warnes & Allen (2005)       | Descriptive | Report of PVFM symptoms | Symptoms of PVFM              | No improvement or decline in symptoms | NR, not calculable |



|                      |             |                         |                  |                                                                                  |                    |
|----------------------|-------------|-------------------------|------------------|----------------------------------------------------------------------------------|--------------------|
| Weir (2002)          | Descriptive | Report of PVFM symptoms | Symptoms of PVFM | 2/2: Symptoms resolved or improved                                               | NR, not calculable |
| Wilson et al. (2009) | Descriptive | Report of PVFM symptoms | Symptoms of PVFM | 1/2: Symptoms resolved or improved<br>1/2: No improvement or decline in symptoms | NR, not calculable |

*Note.* cm H<sub>2</sub>O= centimeters water; FENO = fractional expired nitric oxide; FEV<sub>1</sub>= forced expiratory volume in 1 second; FIF<sub>50</sub>= forced inspiratory flow at 50% of the vital capacity; FIV.5 (FIV<sub>1</sub>)= forced inspiratory vital capacity in the first .5 second (1 second); FIVC= forced total inspiratory vital capacity; F<sub>o</sub>= fundamental frequency; FVC= forced vital capacity; Hz= hertz; IQR= interquartile range; L= liters; M= mean; NR= not reported; NS= not significant; PIFR= peak inspiratory flow rate; PPI= proton pump inhibitor; PVFM= paradoxical vocal fold movement; SEM= standard error of measurement; tx= treatment; VF= vocal folds.
