# Supplementary material
Source: publisher figshare collection journal article supplement (https://asha.figshare.com/articles/dataset/_/6170243)
Supplement: Supplementary file 4 [file 1]

### ONLINE SUPPLEMENTAL MATERIALS – TABLE S3

**Table S3**

*State of the Evidence Pertaining to SLP Treatment for Individuals with PVFM: Group Design Critical Appraisal*

| Citation                  | Study design               | Study protocol | Blinding | Sampling | Allocation | Baseline comparability/<br>patient description | Treatment fidelity | Significance | Precision | Intention to treat |
|---------------------------|----------------------------|----------------|----------|----------|------------|------------------------------------------------|--------------------|--------------|-----------|--------------------|
| Chiang et al. (2013)      | Retrospective case series  | √              | X        | X        | NA         | √                                              | X                  | X            | X         | NA                 |
| Christopher et al. (1983) | Retrospective case series  | X              | X        | X        | NA         | √                                              | X                  | X            | X         | NA                 |
| Doshi et al. (2004)       | Retrospective case series  | X              | X        | X        | NA         | √                                              | X                  | X            | X         | NA                 |
| Maturo et al. (2011)      | Retrospective case series  | √              | X        | X        | NA         | X                                              | X                  | √            | X         | NA                 |
| Murry et al. (2010)       | Retrospective case series  | √              | X        | X        | NA         | √                                              | X                  | √            | X         | NA                 |
| Murry et al. (2004)       | Retrospective case series  | √              | X        | X        | NA         | √                                              | X                  | √            | X         | NA                 |
| Murry et al. (2006)       | Prospective pre-post study | √              | X        | X        | NA         | X                                              | X                  | √            | X         | NA                 |
| Nacci et al. (2011)       | RCT                        | √              | X        | X        | Random, ID | √                                              | X                  | √            | X         | X                  |
| Powell et al. (2007)      | Retrospective case series  | √              | X        | X        | NA         | √                                              | X                  | X            | X         | NA                 |
| Rameau et al. (2012)      | Retrospective case series  | √              | X        | X        | NA         | √                                              | X                  | X            | X         | NA                 |

|                        |                            |   |   |   |    |   |   |   |   |    |
|------------------------|----------------------------|---|---|---|----|---|---|---|---|----|
| Ryan et al. (2009)     | Prospective pre-post study | √ | X | X | NA | √ | X | √ | X | NA |
| Sullivan et al. (2001) | Retrospective case series  | √ | X | X | NA | √ | X | X | X | NA |
| Towey (2012)           | Retrospective case series  | X | X | X | NA | √ | X | X | X | NA |

*Note.* Evaluated using a modification of ASHA’s critical appraisal scheme (Cherney, Patterson, Raymer, Frymark, & Schooling, 2008). Critical appraisal information for Mathers-Schmidt & Brilla (2005) and Vertigan et al. (2008) included in full manuscript, Tables 3 and 4. ID= inadequately described; NA= not applicable; RCT= randomized controlled trial.
